# Supplementary material for: MicroRNAs Affect Complement Regulator Expression and Mitochondrial Activity to Modulate Cell Resistance to Complement-Dependent Cytotoxicity
Source: Oxford University Press journal article supplement (doi:10.1158/2326-6066.cir-18-0818), 2019-09-19
Supplement: 23266066cir180818-sup-212203_3_supp_5772027_pxq777.docx [file 23266066cir180818-sup-212203_3_supp_5772027_pxq777.docx]

**Supplementary Information**

**MicroRNAs affect complement regulator expression and mitochondrial activity to modulate cell resistance to complement-dependent cytotoxicity**

Yaron Hillman1, Mariya Mardamshina2, Metsada Pasmanik-Chor3, Lea Ziporen1, Tamar Geiger2, Noam Shomron1, and Zvi Fishelson1,*

1Department of Cell and Developmental Biology, Sackler Faculty of Medicine, Tel Aviv University, Tel Aviv 69978, Israel

2Department of Human Molecular Genetics and Biochemistry, Sackler Faculty of Medicine, Tel Aviv University, Tel Aviv 69978, Israel

3The Bioinformatics Unit, Faculty of Life Sciences, Tel-Aviv University, Tel Aviv 69978, Israel

To identify miRNA-mediated resistance, RNA samples were extracted from parental and resistant cells, analyzed on microRNA array cards and compared between parental (P, sensitive) and variant (R, resistant) cells. MicroRNA relative expression was calculated based on the comparative threshold cycle (Ct) method. The Ct for each microRNA and endogenous control U6 small nuclear (sn)RNA (used for normalization) in each sample is shown at the end of the Supplementary Information (Array S1). The expression levels of 19 microRNAs were found to be higher in all resistant K562, Raji, and HCT-116 cells relative to their parental cells, and the expression levels of five microRNAs were lower (Student's t-test, *P*<0.01) (Table S1).

**Table S1.** The fold change in the expression level of the 19 upregulated and five downregulated microRNAs in resistant cells compared to non-treated cells (Fig. 1D), in K562, Raji, and HCT-116 cells **(**0.67>differential expression change>1.5 and *P<*0.05).

|  | Fold Change | | |
| --- | --- | --- | --- |
| **miR/Cells** | **K562** | **Raji** | **HCT-116** |
| miR-1254 | 2.92 | 4.39 | 2.28 |
| **miR-328-3p** | **51.67** | **5.31** | **4.98** |
| **miR-616-3p** | **20.18** | **9.16** | **11.47** |
| miR-519a-3p | 9.41 | 6.42 | 10.68 |
| miR-103a-3p | 5.91 | 5.16 | 24.21 |
| miR-486-3p | 5.8 | 71.75 | 7.3 |
| miR-548b-5p | 5.17 | 15.37 | 11.65 |
| miR-199a-3p | 3.6 | 163.31 | 48.17 |
| miR-424-5p | 3.44 | 2.26 | 24.29 |
| miR-139-3p | 3.24 | 18.74 | 2.54 |
| miR-500a-5p | 1.72 | 137.91 | 72.18 |
| miR-342-3p | 3.12 | 16.28 | 2 |
| miR-1247-5p | 3.15 | 32.07 | 7.59 |
| miR-25-5p | 2.83 | 2.31 | 11.06 |
| miR-532-3p | 2.07 | 150.4 | 1.6 |
| miR-106b-3p | 2.67 | 7.04 | 3.2 |
| miR-597-5p | 2.52 | 20.74 | 4.53 |
| miR-617 | 2.34 | 2.34 | 2.92 |
| miR-516-3p | 2.21 | 5.98 | 3.02 |
| **miR-150-5p** | **0.33** | **0.16** | **0.03** |
| miR-126-3p | 0.3 | 0.0001 | 0.36 |
| miR-1225-3p | 0.22 | 0.06 | 0.44 |
| miR-509-5p | 0.18 | 0.05 | 0.29 |
| miR-193a-3p | 0.12 | 0.27 | 0.03 |

Analysis of the biological pathways, significantly and highly represented in the list of proteins up- or downregulated by each microRNA inhibitor, was performed by using DAVID gene ontology enrichment software. Several biological processes (BP) and molecular functions (MF) were enriched after each microRNA inhibition (Table S2).

**Table S2:** Enriched Gene Ontology (GO) functions encompassing proteins differentially expressed between microRNA-inhibited cells and control cells.

1 Each row corresponds to an enriched functional category. *P* – enrichment p-value.

| **Go term**1 | **Representative GO Terms** | ***P*** |
| --- | --- | --- |
|  | **anti-miR-150** |  |
| BP | organophosphate metabolic process; phospholipid biosynthetic process | 0.0014 |
| BP | organelle organization; macromolecular complex subunit organization | 0.0021 |
| BP | regulation of macroautophagy | 0.0045 |
| BP | vesicle-mediated transport | 0.0049 |
| BP | lipid biosynthetic process | 0.0083 |
| BP | cytoskeleton organization | 0.021 |
| BP | ER to Golgi vesicle-mediated transport | 0.019 |
|  |  |  |
|  | **anti-miR-328** |  |
| BP | autophagy; vacuole fusion | 7.97E-04 |
| BP | organelle organization | 0.0019 |
| BP | protein transmembrane transport; mitochondrial transmembrane transport | 0.0046 |
| BP | protein localization; organic substance transport | 0.0066 |
|  |  |  |
|  | **anti-miR-616** |  |
| MF | oxidoreductase activity | 1.01E-04 |
| BP | organelle organization; protein complex assembly | 1.97E-04 |
| BP | mitochondrion organization; ATP metabolic process | 2.43E-04 |
| BP | protein transport | 0.0012 |
| BP | autophagy; regulation of macroautophagy | 0.0016 |
| MF | antioxidant activity | 0.0052 |
| BP | regulation of cytoskeleton organization | 0.0098 |
| BP | vacuolar transport | 0.012 |
| MF | tubulin binding | 0.014 |
| BP | regulation of proteasomal ubiquitin-dependent protein catabolic process | 0.023 |
| BP | I-kB kinase/NF-kB signaling | 0.031 |
| BP | regulation of cell death; apoptotic signaling pathway | 0.033 |

Upon treatment by antibody and complement, the death of cells overexpressing miR-150 was significantly lower (~2-fold change, *P*=0.006) and that of cells overexpressing miR-328 or miR-616 was significantly higher (1.35-fold change, *P*=0.0008 or 1.69-fold change, *P*=0.022, respectively) relative to the death of the control cells (Fig. S1).


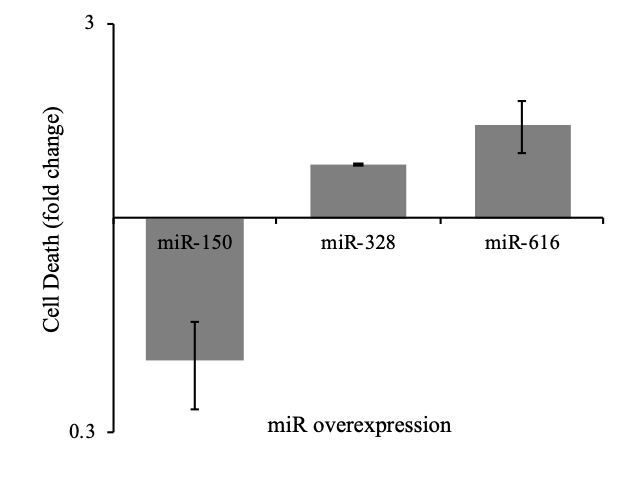


1

*

**

**

**Figure S1.** Significance of miR-150, miR-328, or miR-616 for CDC in HCT-116 cells. HCT-116 cells were transfected with a microRNA expression plasmid of miR-150, miR-328, or miR-616, or a control plasmid. After 24 h, the cells were treated with antibody and NHS and cell death was quantified by PI inclusion. The fold change in cell death relative to control cells was calculated (after data conversion to y/1-y, as explained in Methods; cell death of control cells is 1.0).**, P<0.05, **, P<0.01* relative to control.

Hierarchical clustering of the proteins differentially expressed after inhibition of miR-150, miR-328, or miR-616 (each relative to the control) demonstrates that inhibition of each of the microRNAs resulted in a similar number of up- and downregulated proteins and that the five experimental replicates of each treatment were quite homogenous (Fig. S2).

**Figure S2.** Heatmap presentation of the differentially expressed proteins after inhibition of miR-150 (A), miR-328 (B), or miR-616 (C) compared to control. K562 cells were treated as described in Fig. 5 and their proteomic expression profile was analyzed. Upregulated and downregulated proteins, after miR-150, miR-328, or miR-616 inhibition were analyzed (fold change>1.5 and *P<0.05*).

The membrane complement regulatory proteins CD46, CD55, and CD59 represent the first line of protection from CDC and by far, they are the most studied cellular inhibitors of CDC. CD46 and CD59 are listed in TargetScan as potential targets of miR-616 (Fig. S3). PIGA (phosphatidylinositol N-acetylglucosaminyltransferase subunit A), a predicted target of miR-616 (Fig. S3), is also significantly upregulated (fold change: 1.60 and *P*=0.006) after miR-616 inhibition.

**Figure S3.** Identification of potential miRNA targets among the upregulated proteins after miRNA inhibition. The overlap between the lists of upregulated proteins (fold change>1.5; *P<0.05*) after inhibition of miR-150 **(A)**, miR-328 **(B),** or miR-616 **(C)** (blue circles) and the lists of the predicted targets of these miRNAs (yellow circles) are presented in a Venn diagram. Predictions of the miRNA targets were made using TargetScan (release 7.2).

**Array S1.** The microRNA expression (comparative threshold cycle (Ct) units) in parental, sensitive (P) and resistant (R) K562, Raji, and HCT-116 cells. Readouts from microRNA array cards were obtained and analyzed as explained under Methods.

| **microRNA** | **K562P** | **K562R** | **RajiP** | **RajiR** | **HCT-116P** | **HCT-116R** |
| --- | --- | --- | --- | --- | --- | --- |
| ath-miR159a-000338 |  |  |  |  | 40 | 40 |
| dme-miR-7-000268 |  |  |  |  |  |  |
| hsa-let-7a#-002307 |  |  |  |  |  |  |
| hsa-let-7a-000377 | 34.8641 | 37.5123 | 32.007 | 31.7735 | 30.11 | 29.2605 |
| hsa-let-7b#-002404 |  |  |  |  |  |  |
| hsa-let-7b-002619 | 32.2258 | 31.9771 | 34.0115 | 31.6772 | 30.5456 | 31.2319 |
| hsa-let-7c-000379 | 32.8879 | 32.8168 | 40 | 32.3636 | 36.7485 | 38.0635 |
| hsa-let-7d-002283 | 40 | 38.9677 | 29.151 | 30.3218 | 29.5291 | 28.7531 |
| hsa-let-7e#-002407 |  |  |  |  |  |  |
| hsa-let-7e-002406 | 30.9593 | 29.7893 | 28.1023 | 28.5761 | 26.9973 | 26.6544 |
| hsa-let-7f-000382 | 40 | 40 | 30.9664 | 32.9966 | 32.6059 | 31.013 |
| hsa-let-7f-1#-002417 |  |  |  |  |  |  |
| hsa-let-7f-2#-002418 |  |  |  |  |  |  |
| hsa-let-7g#-002118 |  |  |  |  |  |  |
| hsa-let-7g-002282 | 31.3236 | 32.1392 | 27.5917 | 28.4258 | 28.0012 | 27.6029 |
| hsa-let-7i#-002172 |  |  |  |  |  |  |
| hsa-miR-100#-002142 |  |  |  |  |  |  |
| hsa-miR-100-000437 | 30.1894 | 28.7656 | 30.002 | 29.5886 |  | 28.4554 |
| hsa-miR-101-002253 |  |  |  |  | 17.3825 | 28.2772 |
| hsa-miR-103-000439 | 31.7311 | 30.6407 | 36.933 | 32.7059 | 36.129 | 31.5274 |
| hsa-miR-105#-002168 |  |  |  |  |  |  |
| hsa-miR-105-002167 | 34.3816 | 36.9981 | 28.5149 | 31.4031 | 40 | 30.6657 |
| hsa-miR-106a-002169 | 38.6795 | 22.2285 |  | 21.6232 | 25.1452 | 29.07 |
| hsa-miR-106b#-002380 |  |  |  |  |  |  |
| hsa-miR-106b-000442 |  |  |  |  | 27.258 | 21.9939 |
| hsa-miR-107-000443 | 26.823 | 29.1273 | 40 | 26.6515 | 36.081 | 24.5911 |
| hsa-miR-10a#-002288 |  |  |  |  |  |  |
| hsa-miR-10a-000387 | 34.9167 | 33.3528 | 40 | 33.2729 | 29.8252 | 29.5235 |
| hsa-miR-10b#-002315 |  |  |  |  |  |  |
| hsa-miR-10b-002218 |  |  |  |  | 31.0116 | 29.5089 |
| hsa-miR-1180-002847 |  |  |  |  |  |  |
| hsa-miR-1200-002829 |  |  |  |  |  |  |
| hsa-miR-1201-002781 |  |  |  |  |  |  |
| hsa-miR-1206-002878 |  |  |  |  |  |  |
| hsa-miR-1208-002880 |  |  |  |  |  |  |
| hsa-miR-122-002245 | 32.6969 | 35.9746 | 32.0436 | 32.0103 | 40 | 40 |
| hsa-miR-1225-3P-002766 |  |  |  |  |  |  |
| hsa-miR-1226#-002758 |  |  |  |  |  |  |
| hsa-miR-1227-002769 |  |  |  |  |  |  |
| hsa-miR-1233-002768 |  |  |  |  |  |  |
| hsa-miR-1243-002854 |  |  |  |  |  |  |
| hsa-miR-1244-002791 |  |  |  |  |  |  |
| hsa-miR-1247-002893 |  |  |  |  |  |  |
| hsa-miR-1248-002870 |  |  |  |  |  |  |
| hsa-miR-1249-002868 |  |  |  |  |  |  |
| hsa-miR-1250-002887 |  |  |  |  |  |  |
| hsa-miR-1251-002820 |  |  |  |  |  |  |
| hsa-miR-1253-002894 |  |  |  |  |  |  |
| hsa-miR-1254-002818 |  |  |  |  |  |  |
| hsa-miR-1255A-002805 |  |  |  |  |  |  |
| hsa-miR-1255B-002801 |  |  |  |  |  |  |
| hsa-miR-1256-002850 |  |  |  |  |  |  |
| hsa-miR-1257-002910 |  |  |  |  |  |  |
| hsa-miR-125a-3p-002199 | 40 | 24.9587 | 40 | 21.9335 | 27.733 | 26.1148 |
| hsa-miR-125a-5p-002198 | 29.3718 | 30.7064 | 30.0969 | 29.9522 | 33.7351 | 31.198 |
| hsa-miR-125b-000449 |  |  |  |  | 27.2855 | 23.8247 |
| hsa-miR-125b-2#-002158 |  |  |  |  |  |  |
| hsa-miR-126#-000451 |  |  |  |  |  |  |
| hsa-miR-126-002228 | 22.1972 | 25.3991 | 25.2257 | 36.2111 | 27.3082 | 28.7681 |
| hsa-miR-1260-002896 |  |  |  |  |  |  |
| hsa-miR-1262-002852 |  |  |  |  |  |  |
| hsa-miR-1263-002784 |  |  |  |  |  |  |
| hsa-miR-1267-002885 |  |  |  |  |  |  |
| hsa-miR-1269-002789 |  |  |  |  |  |  |
| hsa-miR-127-5p-002229 |  |  |  |  | 29.8914 | 30.6682 |
| hsa-miR-1270-002807 |  |  |  |  |  |  |
| hsa-miR-1271-002779 |  |  |  |  |  |  |
| hsa-miR-1274A-002883 |  |  |  |  |  |  |
| hsa-miR-1274B-002884 |  |  |  |  |  |  |
| hsa-miR-1275-002840 |  |  |  |  |  |  |
| hsa-miR-1276-002843 |  |  |  |  |  |  |
| hsa-miR-1282-002803 |  |  |  |  |  |  |
| hsa-miR-1285-002822 |  |  |  |  |  |  |
| hsa-miR-1288-002832 |  |  |  |  |  |  |
| hsa-miR-129#-002298 |  |  |  |  |  |  |
| hsa-miR-129-000590 | 39.6817 | 40 | 40 | 26.5543 | 27.9821 | 40 |
| hsa-miR-1290-002863 |  |  |  |  |  |  |
| hsa-miR-1291-002838 |  |  |  |  |  |  |
| hsa-miR-1292-002824 |  |  |  |  |  |  |
| hsa-miR-1296-002908 |  |  |  |  |  |  |
| hsa-miR-1298-002861 |  |  |  |  |  |  |
| hsa-miR-1300-002902 |  |  |  |  |  |  |
| hsa-miR-1301-002827 |  |  |  |  |  |  |
| hsa-miR-1303-002792 |  |  |  |  |  |  |
| hsa-miR-1305-002867 |  |  |  |  |  |  |
| hsa-miR-130a-000454 | 32.6194 | 37.1585 | 30.1547 | 32.983 | 32.5891 | 31.847 |
| hsa-miR-130b#-002114 |  |  |  |  |  |  |
| hsa-miR-130b-000456 | 28.1711 | 32.8765 | 33.1839 | 18.6319 | 36.2421 | 40 |
| hsa-miR-132-000457 | 28.0926 | 30.339 | 30.645 | 31.832 | 29.9454 | 27.7091 |
| hsa-miR-133a-002246 | 31.0013 | 33.7678 | 32.7901 | 32.1006 | 31.261 | 31.6843 |
| hsa-miR-133b-002247 | 31.5838 | 33.5355 | 33.0505 | 33.2123 | 23.8376 | 33.3832 |
| hsa-miR-135a-000460 |  |  |  |  | 14.0225 | 40 |
| hsa-miR-135b#-002159 |  |  |  |  |  |  |
| hsa-miR-135b-002261 | 36.2714 | 33.0421 | 32.605 | 32.2209 | 34.5005 | 31.4295 |
| hsa-miR-136-000592 |  |  |  |  | 26.2593 | 30.1203 |
| hsa-miR-138-002284 | 19.6936 | 21.5504 | 22.401 | 20.1591 | 24.6797 | 22.9558 |
| hsa-miR-138-2#-002144 |  |  |  |  |  |  |
| hsa-miR-139-3p-002313 | 33.79 | 33.5682 | 40 | 33.9121 | 31.291 | 29.9417 |
| hsa-miR-139-5p-002289 |  |  |  |  | 15.1844 | 40 |
| hsa-miR-140-3p-002234 | 29.5292 | 30.3706 | 32.1862 | 29.8631 | 31.8118 | 31.2974 |
| hsa-miR-141#-002145 |  |  |  |  |  |  |
| hsa-miR-141-000463 |  |  |  |  | 27.0142 | 32.0853 |
| hsa-miR-142-3p-000464 |  |  |  |  | 32.758 | 37.5796 |
| hsa-miR-142-5p-002248 | 40 | 40 | 38.1022 | 35.5157 | 40 | 40 |
| hsa-miR-143-002249 | 24.4348 | 31.4885 | 26.9562 | 26.4878 | 26.9767 | 27.375 |
| hsa-miR-145-002278 | 27.9233 | 30.6709 | 32.1766 | 29.6708 | 32.9295 | 33.6429 |
| hsa-miR-146a-000468 | 25.6637 | 40 | 40 | 29.2903 | 35.6869 | 38.9917 |
| hsa-miR-146b-001097 | 24.6564 | 33.1962 | 26.1442 | 25.0627 | 28.9282 | 28.2233 |
| hsa-miR-146b-3p-002361 |  |  |  |  | 34.8353 | 33.2659 |
| hsa-miR-147b-002262 | 32.307 | 27.0371 | 34.3819 | 31.3324 | 33.7057 | 35.9571 |
| hsa-miR-148a-000470 | 32.5958 | 34.8008 | 30.2684 | 30.7094 | 32.3626 | 30.9629 |
| hsa-miR-148b-000471 | 32.6429 | 33.8663 | 32.7153 | 32.5546 | 33.9467 | 32.0042 |
| hsa-miR-149#-002164 |  |  |  |  |  |  |
| hsa-miR-149-002255 | 32.4446 | 34.0417 | 40 | 33.0589 | 28.3871 | 27.0566 |
| hsa-miR-150-000473 | 36.9358 | 40 | 31.896 | 32.6711 | 35.065 | 40 |
| hsa-miR-151-3p-002254 |  |  |  |  |  |  |
| hsa-miR-151-5P-002642 |  |  |  |  |  |  |
| hsa-miR-152-000475 | 34.9256 | 40 | 33.9711 | 31.9859 | 34.5778 | 34.2699 |
| hsa-miR-155#-002287 |  |  |  |  |  |  |
| hsa-miR-155-002623 | 39.9848 | 40 | 40 | 25.2697 | 37.8307 | 40 |
| hsa-miR-15a#-002419 |  |  |  |  |  |  |
| hsa-miR-15a-000389 | 30.1897 | 29.9721 | 30.8319 | 31.9138 | 33.7595 | 33.5838 |
| hsa-miR-15b#-002173 |  |  |  |  |  |  |
| hsa-miR-15b-000390 | 27.6252 | 27.5181 | 27.3863 | 26.4107 | 29.413 | 28.6517 |
| hsa-miR-16-000391 | 21.9371 | 23.2456 | 23.9679 | 22.9704 | 24.5875 | 24.2733 |
| hsa-miR-16-1#-002420 |  |  |  |  |  |  |
| hsa-miR-16-2#-002171 |  |  |  |  |  |  |
| hsa-miR-17#-002421 |  |  |  |  |  |  |
| hsa-miR-17-002308 | 16.9899 | 18.6681 | 20.6217 | 18.6893 | 22.5156 | 21.9758 |
| hsa-miR-181a-000480 | 37.487 | 34.0526 | 30.9895 | 32.2803 | 31.7321 | 32.2948 |
| hsa-miR-181a-2#-002317 |  |  |  |  |  |  |
| hsa-miR-181c#-002333 |  |  |  |  |  |  |
| hsa-miR-181c-000482 |  |  |  |  | 34.1001 | 39.4885 |
| hsa-miR-182-002334 | 28.6861 | 29.7589 | 35.3483 | 30.4449 | 30.6618 | 30.4899 |
| hsa-miR-1825-002907 |  |  |  |  |  |  |
| hsa-miR-183#-002270 |  |  |  |  |  |  |
| hsa-miR-183-002269 | 31.9042 | 30.9745 | 37.0223 | 31.1738 | 30.6517 | 31.0156 |
| hsa-miR-184-000485 | 40 | 36.5134 | 40 | 40 | 40 | 40 |
| hsa-miR-185-002271 | 28.9606 | 30.4692 | 31.7835 | 29.6527 | 30.8634 | 31.1935 |
| hsa-miR-186-002285 | 23.5025 | 25.3776 | 26.0761 | 24.5628 | 26.7294 | 25.6042 |
| hsa-miR-188-3p-002106 |  |  |  |  | 40 | 40 |
| hsa-miR-18a#-002423 |  |  |  |  |  |  |
| hsa-miR-18a-002422 | 24.4948 | 25.3531 | 27.3927 | 25.4062 | 29.0151 | 28.3774 |
| hsa-miR-18b-002217 | 26.9089 | 27.132 | 29.2874 | 27.7697 | 32.6768 | 31.5425 |
| hsa-miR-190-000489 | 40 | 40 | 35.9172 | 34.1998 | 40 | 40 |
| hsa-miR-190b-002263 |  |  |  |  |  |  |
| hsa-miR-191#-002678 |  |  |  |  |  |  |
| hsa-miR-191-002299 | 22.2911 | 24.0822 | 24.174 | 23.1972 | 23.3319 | 23.5313 |
| hsa-miR-192#-002272 |  |  |  |  |  |  |
| hsa-miR-192-000491 | 28.0002 | 27.8489 | 31.4376 | 28.0604 | 31.6518 | 31.8548 |
| hsa-miR-193a-3p-002250 | 35.5684 | 40 | 40 | 40 | 34.9399 | 40 |
| hsa-miR-193a-5p-002281 | 35.2733 | 34.7542 | 34.8476 | 40 | 32.8551 | 31.8511 |
| hsa-miR-193b#-002366 |  |  |  |  |  |  |
| hsa-miR-193b-002367 | 26.5359 | 26.5953 | 25.1703 | 25.4439 | 27.0733 | 26.2717 |
| hsa-miR-194#-002379 |  |  |  |  |  |  |
| hsa-miR-194-000493 | 30.5521 | 31.0036 | 33.6249 | 30.9081 | 32.4942 | 32.405 |
| hsa-miR-195#-002107 |  |  |  |  |  |  |
| hsa-miR-195-000494 | 28.6596 | 29.6656 | 30.9839 | 28.9193 | 29.3094 | 29.9913 |
| hsa-miR-196b-002215 | 33.4496 | 35.6733 | 40 | 35.9825 | 29.6827 | 28.7265 |
| hsa-miR-197-000497 | 29.054 | 30.2593 | 32.0376 | 28.6561 | 29.5516 | 28.9601 |
| hsa-miR-198-002273 | 40 | 40 | 40 | 36.603 | 40 | 40 |
| hsa-miR-199a-3p-002304 | 31.0225 | 30.6482 | 40 | 30.7883 | 40 | 34.4059 |
| hsa-miR-19a#-002424 |  |  |  |  |  |  |
| hsa-miR-19a-000395 | 20.0734 | 20.9072 | 23.9263 | 21.4102 | 26.0955 | 24.5367 |
| hsa-miR-19b-000396 | 17.8338 | 18.915 | 20.9498 | 19.3885 | 23.6486 | 22.8403 |
| hsa-miR-19b-1#-002425 |  |  |  |  |  |  |
| hsa-miR-200a#-001011 |  |  |  |  |  |  |
| hsa-miR-200a-000502 |  |  |  |  | 28.245 | 28.1446 |
| hsa-miR-200b#-002274 |  |  |  |  |  |  |
| hsa-miR-200b-002251 |  |  |  |  | 26.4307 | 25.6462 |
| hsa-miR-200c#-002286 |  |  |  |  |  |  |
| hsa-miR-200c-002300 | 29.6626 | 30.7822 | 34.261 | 32.0205 | 24.0433 | 23.6385 |
| hsa-miR-202-002363 | 40 | 36.7537 | 34.0454 | 36.058 | 39.0903 | 37.3061 |
| hsa-miR-203-000507 |  |  |  |  | 27.5885 | 27.7745 |
| hsa-miR-204-000508 |  |  |  |  | 40 | 40 |
| hsa-miR-206-000510 |  |  |  |  |  |  |
| hsa-miR-208-000511 | 40 | 40 | 40 | 34.726 | 40 | 40 |
| hsa-miR-20a#-002437 |  |  |  |  |  |  |
| hsa-miR-20a-000580 | 19.0334 | 19.5521 | 21.5485 | 20.2388 | 23.6975 | 23.7172 |
| hsa-miR-20b#-002311 |  |  |  |  |  |  |
| hsa-miR-20b-001014 | 26.285 | 27.2845 | 29.4239 | 27.9206 | 31.052 | 30.3131 |
| hsa-miR-21#-002438 |  |  |  |  |  |  |
| hsa-miR-21-000397 | 28.2436 | 27.5692 | 25.9247 | 26.272 | 24.6855 | 24.803 |
| hsa-miR-210-000512 | 30.8707 | 32.0342 | 31.2542 | 29.9795 | 30.3214 | 29.3312 |
| hsa-miR-211-000514 | 40 | 34.8568 | 40 | 40 | 40 | 40 |
| hsa-miR-212-000515 | 30.9072 | 30.5547 | 40 | 32.5677 | 33.1423 | 34.3613 |
| hsa-miR-213-000516 |  |  |  |  |  |  |
| hsa-miR-214-002306 |  |  |  |  | 37.199 | 40 |
| hsa-miR-215-000518 | 40 | 40 | 36.2334 | 32.1994 | 40 | 40 |
| hsa-miR-218-000521 | 35.7245 | 35.8791 | 40 | 40 | 34.231 | 33.7495 |
| hsa-miR-219-1-3p-002095 | 33.9925 | 34.6752 | 35.0589 | 40 | 34.4418 | 35.663 |
| hsa-miR-22#-002301 |  |  |  |  |  |  |
| hsa-miR-22-000398 | 30.9089 | 32.0033 | 40 | 30.372 | 36.6162 | 34.5451 |
| hsa-miR-221#-002096 |  |  |  |  |  |  |
| hsa-miR-221-000524 | 40 | 34.0204 | 40 | 34.554 | 25.5284 | 24.6818 |
| hsa-miR-222#-002097 |  |  |  |  |  |  |
| hsa-miR-222-002276 | 31.1945 | 31.7859 | 29.4132 | 29.1114 | 22.6389 | 22.4739 |
| hsa-miR-223#-002098 |  |  |  |  |  |  |
| hsa-miR-223-002295 | 20.2354 | 21.4503 | 33.5364 | 21.878 | 33.4016 | 35.3554 |
| hsa-miR-224-002099 | 33.5111 | 31.9686 | 40 | 32.9675 | 30.9919 | 31.6597 |
| hsa-miR-23a-000399 |  |  |  |  | 32.5755 | 30.4605 |
| hsa-miR-23b-000400 | 33.9242 | 37.5884 | 36.4274 | 39.7182 | 38.6111 | 33.0981 |
| hsa-miR-24-000402 | 26.1737 | 27.2994 | 29.5307 | 27.3691 | 24.6488 | 23.5616 |
| hsa-miR-24-2#-002441 |  |  |  |  |  |  |
| hsa-miR-25#-002442 |  |  |  |  |  |  |
| hsa-miR-25-000403 | 27.331 | 27.9852 | 29.2165 | 28.1684 | 29.2067 | 28.026 |
| hsa-miR-26a-000405 | 27.6696 | 28.15 | 28.3716 | 27.8277 | 27.9639 | 27.4035 |
| hsa-miR-26a-1#-002443 |  |  |  |  |  |  |
| hsa-miR-26b#-002444 |  |  |  |  |  |  |
| hsa-miR-26b-000407 | 28.0334 | 29.2752 | 29.3423 | 28.3371 | 28.7492 | 28.8103 |
| hsa-miR-27a#-002445 |  |  |  |  |  |  |
| hsa-miR-27a-000408 | 30.4202 | 30.8022 | 40 | 31.9975 | 28.304 | 27.3763 |
| hsa-miR-27b#-002174 |  |  |  |  |  |  |
| hsa-miR-27b-000409 | 31.74 | 33.2003 | 40 | 32.7387 | 33.3223 | 31.665 |
| hsa-miR-28-000411 | 36.9254 | 40 | 30.7191 | 30.8494 | 31.323 | 30.8881 |
| hsa-miR-28-3p-002446 | 35.6794 | 31.9575 | 28.9766 | 28.9607 | 28.1421 | 28.0812 |
| hsa-miR-296-000527 | 40 | 36.4283 | 31.8357 | 32.3369 | 38.0112 | 36.8748 |
| hsa-miR-296-3p-002101 | 40 | 40 | 33.2039 | 40 | 40 | 40 |
| hsa-miR-299-3p-001015 | 40 | 37.5372 | 40 | 34.9744 | 40 | 40 |
| hsa-miR-299-5p-000600 | 40 | 36.4596 | 40 | 40 | 40 | 40 |
| hsa-miR-29a#-002447 |  |  |  |  |  |  |
| hsa-miR-29a-002112 | 26.4021 | 27.2905 | 24.9064 | 25.2756 | 23.7811 | 22.8768 |
| hsa-miR-29b-000413 | 33.9973 | 35.8467 | 31.9965 | 32.2921 | 31.9679 | 30.8847 |
| hsa-miR-29b-2#-002166 |  |  |  |  |  |  |
| hsa-miR-29c-000587 | 32.7295 | 33.1333 | 31.2987 | 31.952 | 29.4016 | 28.7748 |
| hsa-miR-301-000528 | 29.8098 | 30.242 | 30.9339 | 29.5174 | 30.0031 | 28.8431 |
| hsa-miR-301b-002392 | 30.1541 | 30.2092 | 32.5499 | 30.7574 | 31.3168 | 30.2628 |
| hsa-miR-302b#-002119 |  |  |  |  |  |  |
| hsa-miR-302c-000533 | 39.0242 | 35.2935 | 39.467 | 36.0148 | 37.9147 | 40 |
| hsa-miR-30a-3p-000416 |  |  |  |  |  |  |
| hsa-miR-30a-5p-000417 |  |  |  |  |  |  |
| hsa-miR-30b-000602 | 25.4103 | 25.8498 | 26.5382 | 25.2304 | 26.965 | 26.7891 |
| hsa-miR-30c-000419 | 24.4016 | 25.0222 | 26.2358 | 24.9771 | 26.5612 | 25.8386 |
| hsa-miR-30c-1#-002108 |  |  |  |  |  |  |
| hsa-miR-30d#-002305 |  |  |  |  |  |  |
| hsa-miR-30d-000420 |  |  |  |  |  |  |
| hsa-miR-30e-3p-000422 |  |  |  |  |  |  |
| hsa-miR-31#-002113 |  |  |  |  |  |  |
| hsa-miR-31-002279 |  |  |  |  | 22.9286 | 22.2989 |
| hsa-miR-32-002109 | 31.7075 | 32.5118 | 35.0774 | 32.8312 | 37.7314 | 33.9572 |
| hsa-miR-320-002277 | 25.9432 | 25.396 | 26.8591 | 26.0749 | 25.2979 | 24.9335 |
| hsa-miR-320B-002844 |  |  |  |  |  |  |
| hsa-miR-323-3p-002227 | 35.3785 | 33.842 | 34.2155 | 33.6508 | 37.7918 | 32.7253 |
| hsa-miR-324-3p-002161 | 30.1358 | 30.4286 | 30.895 | 30.044 | 31.1195 | 30.1495 |
| hsa-miR-324-5p-000539 | 30.9559 | 31.4903 | 32.1947 | 29.7469 | 30.5895 | 31.8739 |
| hsa-miR-328-000543 | 40 | 35.7806 | 38.299 | 34.0304 | 33.5699 | 31.2494 |
| hsa-miR-330-000544 | 35.3798 | 33.8793 | 34.3807 | 33.0056 | 33.5836 | 33.8648 |
| hsa-miR-331-000545 | 26.7808 | 27.1117 | 26.461 | 25.6106 | 26.3104 | 26.3797 |
| hsa-miR-331-5p-002233 | 30.4532 | 32.7921 | 33.7405 | 32.8878 | 33.4373 | 35.5916 |
| hsa-miR-335#-002185 |  |  |  |  |  |  |
| hsa-miR-335-000546 | 40 | 26.379 | 28.8464 | 33.4138 | 24.9307 | 26.7462 |
| hsa-miR-337-5p-002156 | 36.4755 | 32.812 | 40 | 40 | 32.2967 | 30.921 |
| hsa-miR-338-3p-002252 | 36.0366 | 33.1723 | 40 | 40 | 33.0995 | 33.4225 |
| hsa-miR-338-5P-002658 |  |  |  |  |  |  |
| hsa-miR-339-3p-002184 | 40 | 40 | 40 | 30.2926 | 40 | 40 |
| hsa-miR-339-5p-002257 | 35.3069 | 40 | 32.7058 | 31.045 | 37.6621 | 35.6472 |
| hsa-miR-33a#-002136 |  |  |  |  |  |  |
| hsa-miR-33a-002135 |  |  |  |  |  |  |
| hsa-miR-340#-002259 |  |  |  |  |  |  |
| hsa-miR-340-002258 | 40 | 37.724 | 40 | 30.871 | 13.024 | 39.3026 |
| hsa-miR-342-3p-002260 | 29.2119 | 29.0447 | 33.4055 | 27.5203 | 31.5539 | 30.5506 |
| hsa-miR-342-5p-002147 | 37.2211 | 32.5756 | 33.7516 | 40 | 32.971 | 40 |
| hsa-miR-345-002186 | 35.1299 | 31.1431 | 40 | 27.9983 | 33.1817 | 40 |
| hsa-miR-346-000553 |  |  |  |  | 38.1456 | 35.4556 |
| hsa-miR-34a#-002316 |  |  |  |  |  |  |
| hsa-miR-34a-000426 | 40 | 34.9431 | 34.4611 | 37.1407 | 28.6283 | 28.9084 |
| hsa-miR-34b-002102 |  |  |  |  |  |  |
| hsa-miR-34c-000428 | 40 | 33.682 | 35.5225 | 40 | 40 | 40 |
| hsa-miR-361-000554 | 40 | 34.8551 | 39.9818 | 31.8577 | 21.3406 | 37.0202 |
| hsa-miR-361-3p-002116 |  |  |  |  |  |  |
| hsa-miR-362-001273 | 28.2052 | 27.9791 | 29.1776 | 30.9508 | 28.3144 | 28.0493 |
| hsa-miR-362-3p-002117 | 34.7882 | 29.8879 | 40 | 34.6266 | 37.5227 | 37.9683 |
| hsa-miR-363-001271 |  |  |  |  | 36.0104 | 40 |
| hsa-miR-365-001020 | 33.8418 | 34.329 | 34.3022 | 29.9782 | 33.8428 | 33.1082 |
| hsa-miR-367-000555 | 31.3721 | 30.7936 | 30.5059 | 40 | 30.4465 | 30.5907 |
| hsa-miR-369-3p-000557 |  |  |  |  | 29.9108 | 28.5677 |
| hsa-miR-369-5p-001021 |  |  |  |  | 32.4698 | 36.9738 |
| hsa-miR-370-002275 |  |  |  |  | 36.0195 | 34.8494 |
| hsa-miR-371-3p-002124 | 35.8151 | 40 | 40 | 40 | 32.9691 | 33.4563 |
| hsa-miR-372-000560 | 36.5105 | 38.1457 | 31.9402 | 35.2488 | 34.2232 | 34.2696 |
| hsa-miR-373-000561 | 28.0834 | 29.7457 | 28.7202 | 40 | 30.8023 | 30.051 |
| hsa-miR-374-000563 | 40 | 40 | 40 | 29.3662 | 40 | 40 |
| hsa-miR-374a#-002125 |  |  |  |  |  |  |
| hsa-miR-375-000564 | 36.703 | 34.0196 | 40 | 40 | 30.7774 | 30.5287 |
| hsa-miR-376a-000565 | 36.6376 | 34.9498 | 40 | 40 | 34.4757 | 34.2947 |
| hsa-miR-376c-002122 | 34.7326 | 35.9517 | 40 | 40 | 33.1852 | 33.2039 |
| hsa-miR-378-000567 |  |  |  |  |  |  |
| hsa-miR-378-002243 |  |  |  |  |  |  |
| hsa-miR-381-000571 | 36.8891 | 34.2087 | 37.3263 | 34.9207 | 39.2372 | 39.9638 |
| hsa-miR-382-000572 |  |  |  |  | 34.1514 | 40 |
| hsa-miR-383-000573 | 34.1618 | 30.7392 | 40 | 34.3948 | 40 | 40 |
| hsa-miR-409-3p-002332 |  |  |  |  |  |  |
| hsa-miR-410-001274 | 37.2194 | 35.1588 | 36.077 | 38.3296 | 40 | 34.9807 |
| hsa-miR-411-001610 | 35.8617 | 35.2643 | 40 | 40 | 36.3285 | 36.6453 |
| hsa-miR-422a-002297 | 26.3404 | 27.5837 | 29.0846 | 27.6575 | 29.7436 | 29.4377 |
| hsa-miR-423-5p-002340 | 40 | 32.5778 | 34.2652 | 33.066 | 33.0136 | 32.4496 |
| hsa-miR-424#-002309 |  |  |  |  |  |  |
| hsa-miR-424-000604 | 40 | 39.6912 | 40 | 36.9612 | 40 | 35.394 |
| hsa-miR-425#-002302 |  |  |  |  |  |  |
| hsa-miR-425-5p-001516 | 28.6256 | 28.8564 | 28.6474 | 28.0822 | 29.0996 | 28.9551 |
| hsa-miR-429-001024 |  |  |  |  | 28.0622 | 27.0135 |
| hsa-miR-432#-001027 |  |  |  |  |  |  |
| hsa-miR-432-001026 |  |  |  |  |  |  |
| hsa-miR-433-001028 | 40 | 40 | 34.7555 | 38.4514 | 40 | 40 |
| hsa-miR-448-001029 |  |  |  |  | 20.6022 | 40 |
| hsa-miR-449-001030 | 33.3238 | 40 | 40 | 33.8389 | 32.4368 | 32.711 |
| hsa-miR-449b-001608 | 33.6724 | 37.1345 | 35.4694 | 39.4826 | 32.7946 | 32.5059 |
| hsa-miR-450a-002303 |  |  |  |  | 36.2057 | 34.6558 |
| hsa-miR-450b-5p-002207 | 40 | 34.2715 | 40 | 40 | 40 | 40 |
| hsa-miR-452-002329 | 33.2538 | 36.8183 | 40 | 36.3435 | 32.5313 | 32.9324 |
| hsa-miR-454#-001996 |  |  |  |  |  |  |
| hsa-miR-454-002323 | 25.0535 | 26.6495 | 27.5811 | 26.1365 | 28.3309 | 27.6383 |
| hsa-miR-455-001280 |  |  |  |  | 33.0295 | 31.2242 |
| hsa-miR-455-3p-002244 |  |  |  |  | 33.6284 | 32.9541 |
| hsa-miR-483-3p-002339 |  |  |  |  |  |  |
| hsa-miR-483-5p-002338 | 33.7037 | 38.8662 | 35.6608 | 34.6442 | 32.6814 | 32.6438 |
| hsa-miR-484-001821 | 22.7561 | 23.5868 | 26.1387 | 23.745 | 26.0157 | 25.4391 |
| hsa-miR-485-3p-001277 | 38.4845 | 36.3208 | 36.6226 | 35.2945 | 38.8837 | 40 |
| hsa-miR-486-001278 | 24.6048 | 24.7768 | 32.245 | 25.9946 | 32.7663 | 33.9483 |
| hsa-miR-486-3p-002093 | 29.9753 | 28.9115 | 40 | 31.9748 | 40 | 37.1279 |
| hsa-miR-487a-001279 | 33.6509 | 33.1807 | 33.561 | 31.696 | 34.3328 | 40 |
| hsa-miR-487b-001285 |  |  |  |  | 40 | 34.4905 |
| hsa-miR-488-001106 |  |  |  |  |  |  |
| hsa-miR-489-002358 | 32.3798 | 32.2749 | 34.9244 | 35.2745 | 34.5861 | 33.0979 |
| hsa-miR-490-001037 |  |  |  |  | 37.082 | 40 |
| hsa-miR-494-002365 | 31.2342 | 30.8786 | 32.4768 | 30.2916 | 31.3386 | 32.4783 |
| hsa-miR-497-001043 |  |  |  |  |  |  |
| hsa-miR-500-001046 |  |  |  |  |  |  |
| hsa-miR-500-002428 | 30.5642 | 31.2517 | 40 | 31.0322 | 37.743 | 31.5655 |
| hsa-miR-501-001047 | 30.7517 | 31.1235 | 35.5849 | 30.0366 | 31.4591 | 31.0987 |
| hsa-miR-501-3p-002435 | 34.7906 | 33.2918 | 40 | 40 | 38.1713 | 33.3004 |
| hsa-miR-502-001109 | 33.0751 | 32.9026 | 40 | 40 | 34.4224 | 33.4355 |
| hsa-miR-502-3p-002083 | 34.0162 | 33.2043 | 40 | 33.3708 | 34.145 | 34.4975 |
| hsa-miR-503-001048 |  |  |  |  | 40 | 33.1453 |
| hsa-miR-505#-002087 |  |  |  |  |  |  |
| hsa-miR-505-002089 | 40 | 40 | 40 | 32.7335 | 31.9556 | 37.3199 |
| hsa-miR-508-001052 | 40 | 40 | 33.2862 | 40 | 40 | 40 |
| hsa-miR-509-5p-002235 | 35.0886 | 40 | 36.4168 | 40 | 38.2296 | 40 |
| hsa-miR-511-001111 |  |  |  |  | 37.0166 | 40 |
| hsa-miR-512-3p-001823 | 35.5648 | 40 | 40 | 40 | 40 | 40 |
| hsa-miR-515-5p-001112 |  |  |  |  | 40 | 12.427 |
| hsa-miR-516-3p-001149 |  |  |  |  |  |  |
| hsa-miR-517a-002402 | 40 | 35.6105 | 40 | 40 | 40 | 40 |
| hsa-miR-517c-001153 | 39.4331 | 33.0964 | 40 | 40 | 40 | 40 |
| hsa-miR-518a-3p-002397 | 40 | 36.6258 | 40 | 35.773 | 40 | 40 |
| hsa-miR-518b-001156 | 36.626 | 38.1129 | 38.3132 | 36.19 | 40 | 40 |
| hsa-miR-518d-001159 |  |  |  |  | 33.6732 | 40 |
| hsa-miR-518e-002395 | 38.7731 | 39.4829 | 37.536 | 39.8061 | 37.3349 | 40 |
| hsa-miR-518f-002388 | 26.3212 | 25.6508 | 24.482 | 24.7957 | 27.2462 | 27.617 |
| hsa-miR-519a-002415 | 40 | 37.9091 | 40 | 35.0431 | 40 | 36.5792 |
| hsa-miR-519d-002403 | 40 | 37.388 | 36.1916 | 38.5225 | 40 | 40 |
| hsa-miR-519e-002370 | 40 | 40 | 35.9357 | 38.0832 | 40 | 40 |
| hsa-miR-520c-3p-002400 |  |  |  |  |  |  |
| hsa-miR-520D-3P-002743 |  |  |  |  |  |  |
| hsa-miR-523-002386 |  |  |  |  | 38.2656 | 40 |
| hsa-miR-532-001518 | 27.0107 | 27.3797 | 40 | 27.8375 | 29.3584 | 28.377 |
| hsa-miR-532-3p-002355 | 30.2892 | 30.7145 | 40 | 30.9071 | 31.8425 | 31.1586 |
| hsa-miR-539-001286 |  |  |  |  | 34.6176 | 40 |
| hsa-miR-542-3p-001284 |  |  |  |  | 40 | 17.7268 |
| hsa-miR-542-5p-002240 |  |  |  |  | 34.6644 | 40 |
| hsa-miR-545#-002266 |  |  |  |  |  |  |
| hsa-miR-545-002267 | 33.433 | 34.9348 | 38.338 | 33.8243 | 34.7428 | 40 |
| hsa-miR-548b-001541 |  |  |  |  | 40 | 35.8148 |
| hsa-miR-548b-5p-002408 | 34.9007 | 34.0014 | 40 | 34.1977 | 40 | 36.4536 |
| hsa-miR-548c-5p-002429 | 35.3663 | 40 | 40 | 40 | 40 | 37.4186 |
| hsa-miR-548d-001605 | 34.9459 | 38.0404 | 35.4209 | 40 | 34.5679 | 35.3541 |
| hsa-miR-548d-5p-002237 | 34.167 | 36.4016 | 33.5797 | 33.4013 | 40 | 34.4198 |
| hsa-miR-548E-002881 |  |  |  |  |  |  |
| hsa-miR-548H-002816 |  |  |  |  |  |  |
| hsa-miR-548I-002909 |  |  |  |  |  |  |
| hsa-miR-548J-002783 |  |  |  |  |  |  |
| hsa-miR-548K-002819 |  |  |  |  |  |  |
| hsa-miR-548N-002888 |  |  |  |  |  |  |
| hsa-miR-548P-002798 |  |  |  |  |  |  |
| hsa-miR-549-001511 |  |  |  |  |  |  |
| hsa-miR-550-001544 |  |  |  |  |  |  |
| hsa-miR-550-002410 |  |  |  |  |  |  |
| hsa-miR-551b#-002346 |  |  |  |  |  |  |
| hsa-miR-558-001526 |  |  |  |  |  |  |
| hsa-miR-561-001528 | 34.7227 | 40 | 40 | 40 | 40 | 40 |
| hsa-miR-563-001530 |  |  |  |  |  |  |
| hsa-miR-564-001531 |  |  |  |  |  |  |
| hsa-miR-569-001536 |  |  |  |  |  |  |
| hsa-miR-570-002347 | 34.9674 | 40 | 40 | 34.171 | 40 | 40 |
| hsa-miR-571-001613 |  |  |  |  |  |  |
| hsa-miR-572-001614 |  |  |  |  |  |  |
| hsa-miR-573-001615 |  |  |  |  |  |  |
| hsa-miR-574-3p-002349 | 31.7296 | 32.3921 | 34.0009 | 32.7832 | 27.4966 | 26.3893 |
| hsa-miR-575-001617 |  |  |  |  |  |  |
| hsa-miR-576-3p-002351 | 32.8997 | 32.9515 | 34.64 | 32.7996 | 34.5206 | 32.1356 |
| hsa-miR-576-5p-002350 | 36.4085 | 40 | 40 | 40 | 40 | 40 |
| hsa-miR-577-002675 |  |  |  |  |  |  |
| hsa-miR-579-002398 | 30.5931 | 31.7677 | 33.4 | 33.1612 | 40 | 40 |
| hsa-miR-580-001621 |  |  |  |  |  |  |
| hsa-miR-582-3p-002399 | 39.659 | 40 | 37.652 | 28.863 | 40 | 40 |
| hsa-miR-582-5p-001983 | 37.606 | 40 | 33.2941 | 33.1313 | 40 | 40 |
| hsa-miR-584-001624 |  |  |  |  |  |  |
| hsa-miR-586-001539 |  |  |  |  |  |  |
| hsa-miR-588-001542 |  |  |  |  |  |  |
| hsa-miR-589-001543 |  |  |  |  |  |  |
| hsa-miR-590-3P-002677 |  |  |  |  |  |  |
| hsa-miR-590-5p-001984 | 26.1143 | 27.495 | 29.1638 | 27.6833 | 28.4464 | 27.9082 |
| hsa-miR-595-001987 |  |  |  |  |  |  |
| hsa-miR-597-001551 | 32.9158 | 33.0554 | 40 | 33.7656 | 36.7997 | 34.6177 |
| hsa-miR-598-001988 | 40 | 40 | 30.1583 | 30.9791 | 40 | 40 |
| hsa-miR-599-001554 |  |  |  |  |  |  |
| hsa-miR-601-001558 |  |  |  |  |  |  |
| hsa-miR-604-001567 |  |  |  |  |  |  |
| hsa-miR-605-001568 |  |  |  |  |  |  |
| hsa-miR-606-001569 |  |  |  |  |  |  |
| hsa-miR-608-001571 |  |  |  |  |  |  |
| hsa-miR-609-001573 |  |  |  |  |  |  |
| hsa-miR-613-001586 |  |  |  |  |  |  |
| hsa-miR-615-5p-002353 |  |  |  |  | 34.3308 | 36.4866 |
| hsa-miR-616-002414 | 37.549 | 34.6859 | 40 | 34.9445 | 40 | 36.4757 |
| hsa-miR-617-001591 |  |  |  |  |  |  |
| hsa-miR-618-001593 | 40 | 36.2811 | 39.6163 | 38.4901 | 36.3539 | 37.4965 |
| hsa-miR-622-001553 |  |  |  |  |  |  |
| hsa-miR-625#-002432 |  |  |  |  |  |  |
| hsa-miR-625-002431 | 31.1879 | 31.4924 | 32.4653 | 31.4718 | 33.9001 | 33.08 |
| hsa-miR-627-001560 | 33.0039 | 38.415 | 34.4967 | 30.4023 | 36.4139 | 40 |
| hsa-miR-628-3p-002434 |  |  |  |  |  |  |
| hsa-miR-628-5p-002433 | 29.9544 | 31.6483 | 33.9756 | 32.2693 | 33.9681 | 33.9763 |
| hsa-miR-629-001562 |  |  |  |  |  |  |
| hsa-miR-629-002436 | 33.6193 | 34.1581 | 33.8844 | 34.381 | 40 | 33.5407 |
| hsa-miR-635-001578 |  |  |  |  |  |  |
| hsa-miR-636-002088 | 31.7328 | 33.7145 | 32.9841 | 35.4007 | 33.1822 | 32.9507 |
| hsa-miR-642-001592 | 33.1421 | 31.1153 | 33.8162 | 31.3843 | 31.5425 | 31.1694 |
| hsa-miR-649-001602 |  |  |  |  |  |  |
| hsa-miR-650-001603 |  |  |  |  |  |  |
| hsa-miR-651-001604 | 40 | 35.0525 | 40 | 40 | 40 | 40 |
| hsa-miR-652-002352 | 30.6017 | 31.1806 | 34.667 | 30.4389 | 33.8164 | 32.3017 |
| hsa-miR-655-001612 | 37.8246 | 40 | 40 | 40 | 33.8094 | 35.9586 |
| hsa-miR-656-001510 |  |  |  |  |  |  |
| hsa-miR-657-001512 |  |  |  |  |  |  |
| hsa-miR-660-001515 | 28.1187 | 28.4587 | 40 | 28.651 | 29.6979 | 29.6053 |
| hsa-miR-661-001606 |  |  |  |  |  |  |
| hsa-miR-662-001607 |  |  |  |  |  |  |
| hsa-miR-663B-002857 |  |  |  |  |  |  |
| hsa-miR-664-002897 |  |  |  |  |  |  |
| hsa-miR-665-002681 |  |  |  |  |  |  |
| hsa-miR-671-3p-002322 | 32.9081 | 30.369 | 32.8998 | 36.9498 | 31.9939 | 31.1974 |
| hsa-miR-675-002005 |  |  |  |  |  |  |
| hsa-miR-720-002895 |  |  |  |  |  |  |
| hsa-miR-744#-002325 |  |  |  |  |  |  |
| hsa-miR-744-002324 | 29.7618 | 29.9147 | 30.2139 | 29.3232 | 29.4488 | 28.8982 |
| hsa-miR-766-001986 |  |  |  |  |  |  |
| hsa-miR-767-5p-001993 |  |  |  |  |  |  |
| hsa-miR-769-5p-001998 |  |  |  |  |  |  |
| hsa-miR-802-002004 |  |  |  |  |  |  |
| hsa-miR-875-5p-002203 |  |  |  |  |  |  |
| hsa-miR-885-5p-002296 | 34.1496 | 34.7246 | 33.8154 | 36.5818 | 35.5036 | 40 |
| hsa-miR-886-3p-002194 | 27.9452 | 28.5125 | 30.4151 | 28.2911 | 30.3122 | 31.5245 |
| hsa-miR-886-5p-002193 | 28.3191 | 28.2258 | 28.2134 | 27.9718 | 30.2053 | 29.6753 |
| hsa-miR-888-002212 | 31.356 | 31.674 | 35.3993 | 30.7433 | 31.6473 | 33.334 |
| hsa-miR-891a-002191 | 40 | 40 | 35.3587 | 40 | 40 | 40 |
| hsa-miR-892b-002214 |  |  |  |  |  |  |
| hsa-miR-9#-002231 |  |  |  |  |  |  |
| hsa-miR-9-000583 | 29.6659 | 31.288 | 27.9831 | 28.3316 | 28.4603 | 27.9841 |
| hsa-miR-920-002150 |  |  |  |  |  |  |
| hsa-miR-921-002151 |  |  |  |  |  |  |
| hsa-miR-922-002152 |  |  |  |  |  |  |
| hsa-miR-924-002154 |  |  |  |  |  |  |
| hsa-miR-92a-000431 | 25.7965 | 25.2879 | 27.2457 | 23.5046 | 27.4901 | 26.8397 |
| hsa-miR-92a-1#-002137 |  |  |  |  |  |  |
| hsa-miR-92b#-002343 |  |  |  |  |  |  |
| hsa-miR-93#-002139 |  |  |  |  |  |  |
| hsa-miR-934-002177 |  |  |  |  |  |  |
| hsa-miR-935-002178 |  |  |  |  |  |  |
| hsa-miR-938-002181 |  |  |  |  |  |  |
| hsa-miR-939-002182 |  |  |  |  |  |  |
| hsa-miR-941-002183 |  |  |  |  |  |  |
| hsa-miR-942-002187 |  |  |  |  |  |  |
| hsa-miR-943-002188 |  |  |  |  |  |  |
| hsa-miR-944-002189 |  |  |  |  |  |  |
| hsa-miR-95-000433 |  |  |  |  | 35.0901 | 30.8066 |
| hsa-miR-98-000577 | 40 | 32.4246 | 29.895 | 28.8206 | 33.9692 | 25.4951 |
| hsa-miR-99a#-002141 |  |  |  |  |  |  |
| hsa-miR-99a-000435 | 29.0944 | 28.2782 | 29.4706 | 40 | 31.4228 | 28.1868 |
| hsa-miR-99b#-002196 |  |  |  |  |  |  |
| hsa-miR-99b-000436 | 30.2151 | 30.5698 | 40 | 29.071 | 34.8964 | 28.8391 |
| mmu-let-7d#-001178 |  |  |  |  |  |  |
| mmu-miR-124a-001182 | 40 | 40 | 27.2341 | 27.22 | 39.0499 | 28.4718 |
| mmu-miR-129-3p-001184 | 40 | 40 | 40 | 25.9881 | 40 | 27.078 |
| mmu-miR-134-001186 |  |  |  |  | 40 | 40 |
| mmu-miR-137-001129 | 29.6194 | 30.3137 | 35.1892 | 31.0465 | 29.6676 | 30.5408 |
| mmu-miR-140-001187 | 24.4967 | 27.4262 | 26.6307 | 26.0188 | 27.6969 | 26.1892 |
| mmu-miR-374-5p-001319 | 24.5812 | 25.3082 | 28.2581 | 25.642 | 27.7358 | 27.4038 |
| mmu-miR-451-001141 | 30.3308 | 31.0047 | 40 | 30.9958 | 40 | 40 |
| mmu-miR-491-001630 | 38.9489 | 33.3817 | 33.805 | 31.7574 | 31.7165 | 31.0424 |
| mmu-miR-495-001663 |  |  |  |  | 33.5637 | 34.7011 |
| mmu-miR-615-001960 | 40 | 33.8594 | 40 | 32.8823 | 40 | 38.1424 |
| mmu-miR-93-001090 | 40 | 40 | 32.2768 | 25.9774 | 27.5861 | 26.7181 |
| mmu-miR-96-000186 |  |  |  |  | 22.5694 | 40 |
| rno-miR-29c#-001818 |  |  |  |  |  |  |
| rno-miR-7#-001338 |  |  |  |  |  |  |
| RNU48-001006 | 18.8396 | 19.7361 | 21.7857 | 20.1006 | 22.5008 | 22.5526 |
| U6 snRNA-001973 | 16.2502 | 18.2977 | 20.1132 | 18.0778 | 20.5487 | 20.489 |
| ath-miR159a-000338 |  |  |  |  |  |  |
| dme-miR-7-000268 | 31.9645 | 32.2009 | 35.8471 | 32.6373 | 30.6557 | 31.5752 |
| hsa-let-7a#-002307 |  |  |  |  | 40 | 34.5437 |
| hsa-let-7a-000377 |  |  |  |  |  |  |
| hsa-let-7b#-002404 | 40 | 40 | 40 | 14.3893 | 40 | 40 |
| hsa-let-7b-002619 |  |  |  |  |  |  |
| hsa-let-7c-000379 |  |  |  |  |  |  |
| hsa-let-7d-002283 |  |  |  |  |  |  |
| hsa-let-7e#-002407 |  |  |  |  | 40 | 35.6586 |
| hsa-let-7e-002406 |  |  |  |  |  |  |
| hsa-let-7f-000382 |  |  |  |  |  |  |
| hsa-let-7f-1#-002417 |  |  |  |  | 35.2183 | 37.9862 |
| hsa-let-7f-2#-002418 |  |  |  |  | 34.7281 | 35.2059 |
| hsa-let-7g#-002118 |  |  |  |  | 34.2724 | 40 |
| hsa-let-7g-002282 |  |  |  |  |  |  |
| hsa-let-7i#-002172 | 26.9535 | 28.5542 | 31.6262 | 30.4116 | 26.6305 | 27.7533 |
| hsa-miR-100#-002142 |  |  |  |  | 32.9396 | 32.217 |
| hsa-miR-100-000437 |  |  |  |  |  |  |
| hsa-miR-101-002253 |  |  |  |  |  |  |
| hsa-miR-103-000439 |  |  |  |  |  |  |
| hsa-miR-105#-002168 | 30.1355 | 32.3665 | 30.3039 | 30.4065 | 30.0941 | 32.1194 |
| hsa-miR-105-002167 |  |  |  |  |  |  |
| hsa-miR-106a-002169 |  |  |  |  |  |  |
| hsa-miR-106b#-002380 | 28.1753 | 28.4119 | 31.3762 | 28.474 | 31.3223 | 29.8292 |
| hsa-miR-106b-000442 |  |  |  |  |  |  |
| hsa-miR-107-000443 |  |  |  |  |  |  |
| hsa-miR-10a#-002288 |  |  |  |  | 40 | 35.1907 |
| hsa-miR-10a-000387 |  |  |  |  |  |  |
| hsa-miR-10b#-002315 | 40 | 35.7371 | 38.4224 | 33.9739 | 33.458 | 32.5021 |
| hsa-miR-10b-002218 |  |  |  |  |  |  |
| hsa-miR-1180-002847 | 30.7353 | 32.4215 | 32.129 | 30.9299 | 29.7115 | 29.5059 |
| hsa-miR-1200-002829 |  |  |  |  | 37.4977 | 40 |
| hsa-miR-1201-002781 | 31.3154 | 30.815 | 31.9592 | 32.1402 | 32.4838 | 34.0526 |
| hsa-miR-1206-002878 |  |  |  |  | 37.0588 | 40 |
| hsa-miR-1208-002880 | 33.4618 | 32.7265 | 32.1703 | 32.1234 | 32.7393 | 34.5397 |
| hsa-miR-122-002245 |  |  |  |  |  |  |
| hsa-miR-1225-3P-002766 | 31.4705 | 35.2947 | 31.2494 | 34.4029 | 34.1252 | 35.4796 |
| hsa-miR-1226#-002758 | 33.4152 | 32.9 | 32.7148 | 34.2039 | 32.7135 | 34.5888 |
| hsa-miR-1227-002769 | 32.7692 | 35.0315 | 36.038 | 33.2698 | 35.6487 | 40 |
| hsa-miR-1233-002768 | 30.3723 | 32.5683 | 29.7001 | 29.2004 | 30.9616 | 30.8146 |
| hsa-miR-1243-002854 | 40 | 40 | 35.9732 | 40 | 40 | 40 |
| hsa-miR-1244-002791 | 33.5333 | 40 | 34.7274 | 34.4829 | 34.3515 | 36.581 |
| hsa-miR-1247-002893 | 40 | 40 | 40 | 34.2441 | 34.2255 | 31.4838 |
| hsa-miR-1248-002870 | 40 | 40 | 40 | 36.3399 | 36.2087 | 40 |
| hsa-miR-1249-002868 | 33.3093 | 40 | 40 | 36.6035 | 40 | 40 |
| hsa-miR-1250-002887 | 30.5645 | 40 | 40 | 40 | 40 | 40 |
| hsa-miR-1251-002820 |  |  |  |  | 40 | 24.9227 |
| hsa-miR-1253-002894 | 35.7754 | 35.8409 | 33.2852 | 35.0903 | 39.8 | 40 |
| hsa-miR-1254-002818 | 31.9866 | 32.0994 | 34.3068 | 31.4202 | 33.613 | 32.6041 |
| hsa-miR-1255A-002805 | 33.7747 | 40 | 40 | 40 | 37.9064 | 33.8864 |
| hsa-miR-1255B-002801 | 32.5106 | 33.9378 | 34.1475 | 37.0462 | 34.6944 | 34.6119 |
| hsa-miR-1256-002850 |  |  |  |  | 40 | 40 |
| hsa-miR-1257-002910 |  |  |  |  | 40 | 40 |
| hsa-miR-125a-3p-002199 |  |  |  |  |  |  |
| hsa-miR-125a-5p-002198 |  |  |  |  |  |  |
| hsa-miR-125b-000449 |  |  |  |  |  |  |
| hsa-miR-125b-2#-002158 | 31.2218 | 40 | 33.4497 | 32.8184 | 39.0384 | 40 |
| hsa-miR-126#-000451 | 26.4018 | 29.4023 | 40 | 31.2867 | 30.1149 | 30.2716 |
| hsa-miR-126-002228 |  |  |  |  |  |  |
| hsa-miR-1260-002896 | 27.7009 | 29.0881 | 29.3134 | 28.1796 | 27.8581 | 28.7533 |
| hsa-miR-1262-002852 | 40 | 36.3196 | 36.3154 | 37.594 | 35.7187 | 38.0487 |
| hsa-miR-1263-002784 | 35.0584 | 40 | 40 | 40 | 40 | 40 |
| hsa-miR-1267-002885 | 25.9361 | 33.4201 | 33.7802 | 36.0532 | 40 | 38.152 |
| hsa-miR-1269-002789 | 40 | 34.3039 | 40 | 40 | 40 | 40 |
| hsa-miR-127-5p-002229 |  |  |  |  |  |  |
| hsa-miR-1270-002807 | 40 | 35.1115 | 32.0283 | 32.7704 | 40 | 40 |
| hsa-miR-1271-002779 | 35.3639 | 40 | 40 | 40 | 40 | 40 |
| hsa-miR-1274A-002883 | 23.033 | 23.9357 | 25.6932 | 24.6734 | 23.9473 | 24.021 |
| hsa-miR-1274B-002884 | 22.298 | 23.3986 | 23.8762 | 22.9257 | 22.5877 | 22.9564 |
| hsa-miR-1275-002840 | 28.0326 | 29.2167 | 28.5329 | 28.5063 | 29.9219 | 30.2928 |
| hsa-miR-1276-002843 | 36.041 | 35.8852 | 38.2087 | 37.1304 | 38.5782 | 32.8762 |
| hsa-miR-1282-002803 | 34.441 | 40 | 40 | 40 | 40 | 40 |
| hsa-miR-1285-002822 | 32.2888 | 33.1051 | 33.5163 | 33.3662 | 32.9651 | 33.4255 |
| hsa-miR-1288-002832 | 36.2684 | 40 | 40 | 40 | 40 | 40 |
| hsa-miR-129#-002298 | 40 | 40 | 40 | 36.2149 | 40 | 40 |
| hsa-miR-129-000590 |  |  |  |  |  |  |
| hsa-miR-1290-002863 | 33.9618 | 34.2309 | 32.3408 | 30.8828 | 31.6974 | 31.8302 |
| hsa-miR-1291-002838 | 35.3232 | 36.735 | 38.1975 | 39.5702 | 40 | 37.159 |
| hsa-miR-1292-002824 | 40 | 34.4697 | 40 | 40 | 40 | 40 |
| hsa-miR-1296-002908 | 31.6991 | 31.9018 | 40 | 33.3271 | 31.7232 | 30.7878 |
| hsa-miR-1298-002861 |  |  |  |  | 40 | 33.5796 |
| hsa-miR-1300-002902 | 34.8081 | 33.9458 | 33.1158 | 34.8314 | 33.2476 | 34.2283 |
| hsa-miR-1301-002827 |  |  |  |  | 33.3267 | 31.9953 |
| hsa-miR-1303-002792 |  |  |  |  | 35.0622 | 40 |
| hsa-miR-1305-002867 |  |  |  |  | 35.4907 | 33.5457 |
| hsa-miR-130a-000454 |  |  |  |  |  |  |
| hsa-miR-130b#-002114 | 27.8749 | 28.3385 | 30.8726 | 28.5944 | 30.5521 | 30.4794 |
| hsa-miR-130b-000456 |  |  |  |  |  |  |
| hsa-miR-132-000457 |  |  |  |  |  |  |
| hsa-miR-133a-002246 |  |  |  |  |  |  |
| hsa-miR-133b-002247 |  |  |  |  |  |  |
| hsa-miR-135a-000460 |  |  |  |  |  |  |
| hsa-miR-135b#-002159 |  |  |  |  | 35.2448 | 32.88 |
| hsa-miR-135b-002261 |  |  |  |  |  |  |
| hsa-miR-136-000592 |  |  |  |  |  |  |
| hsa-miR-138-002284 |  |  |  |  |  |  |
| hsa-miR-138-2#-002144 |  |  |  |  | 34.3592 | 34.2947 |
| hsa-miR-139-3p-002313 |  |  |  |  |  |  |
| hsa-miR-139-5p-002289 |  |  |  |  |  |  |
| hsa-miR-140-3p-002234 |  |  |  |  |  |  |
| hsa-miR-141#-002145 |  |  |  |  | 36.5024 | 40 |
| hsa-miR-141-000463 |  |  |  |  |  |  |
| hsa-miR-142-3p-000464 |  |  |  |  |  |  |
| hsa-miR-142-5p-002248 |  |  |  |  |  |  |
| hsa-miR-143-002249 |  |  |  |  |  |  |
| hsa-miR-145-002278 |  |  |  |  |  |  |
| hsa-miR-146a-000468 |  |  |  |  |  |  |
| hsa-miR-146b-001097 |  |  |  |  |  |  |
| hsa-miR-146b-3p-002361 |  |  |  |  |  |  |
| hsa-miR-147b-002262 |  |  |  |  |  |  |
| hsa-miR-148a-000470 |  |  |  |  |  |  |
| hsa-miR-148b-000471 |  |  |  |  |  |  |
| hsa-miR-149#-002164 |  |  |  |  | 35.3211 | 40 |
| hsa-miR-149-002255 |  |  |  |  |  |  |
| hsa-miR-150-000473 |  |  |  |  |  |  |
| hsa-miR-151-3p-002254 | 23.6575 | 24.4209 | 23.0668 | 22.9993 | 23.101 | 23.8094 |
| hsa-miR-151-5P-002642 | 30.3541 | 31.5267 | 31.9875 | 31.0966 | 28.9023 | 29.5437 |
| hsa-miR-152-000475 |  |  |  |  |  |  |
| hsa-miR-155#-002287 | 40 | 40 | 36.1555 | 40 | 40 | 40 |
| hsa-miR-155-002623 |  |  |  |  |  |  |
| hsa-miR-15a#-002419 | 31.0112 | 32.0677 | 32.9748 | 31.0979 | 40 | 33.7863 |
| hsa-miR-15a-000389 |  |  |  |  |  |  |
| hsa-miR-15b#-002173 | 32.5866 | 33.2239 | 40 | 33.7269 | 34.318 | 35.1119 |
| hsa-miR-15b-000390 |  |  |  |  |  |  |
| hsa-miR-16-000391 |  |  |  |  |  |  |
| hsa-miR-16-1#-002420 | 31.0598 | 32.1404 | 31.8709 | 32.6777 | 40 | 34.4734 |
| hsa-miR-16-2#-002171 | 24.8426 | 26.3186 | 26.3964 | 25.6136 | 26.742 | 28.2739 |
| hsa-miR-17#-002421 | 29.809 | 31.2061 | 34.6778 | 32.2029 | 34.3908 | 37.6819 |
| hsa-miR-17-002308 |  |  |  |  |  |  |
| hsa-miR-181a-000480 |  |  |  |  |  |  |
| hsa-miR-181a-2#-002317 | 32.4553 | 34.0791 | 40 | 40 | 36.0291 | 32.4483 |
| hsa-miR-181c#-002333 |  |  |  |  | 40 | 35.5841 |
| hsa-miR-181c-000482 |  |  |  |  |  |  |
| hsa-miR-182-002334 |  |  |  |  |  |  |
| hsa-miR-1825-002907 |  |  |  |  | 32.6198 | 33.4705 |
| hsa-miR-183#-002270 | 29.152 | 29.2311 | 40 | 30.4721 | 31.2586 | 30.5964 |
| hsa-miR-183-002269 |  |  |  |  |  |  |
| hsa-miR-184-000485 |  |  |  |  |  |  |
| hsa-miR-185-002271 |  |  |  |  |  |  |
| hsa-miR-186-002285 |  |  |  |  |  |  |
| hsa-miR-188-3p-002106 |  |  |  |  |  |  |
| hsa-miR-18a#-002423 | 28.1465 | 28.895 | 31.7608 | 28.9327 | 33.3688 | 31.945 |
| hsa-miR-18a-002422 |  |  |  |  |  |  |
| hsa-miR-18b-002217 |  |  |  |  |  |  |
| hsa-miR-190-000489 |  |  |  |  |  |  |
| hsa-miR-190b-002263 |  |  |  |  | 35.7218 | 40 |
| hsa-miR-191#-002678 | 31.8585 | 32.2474 | 40 | 32.7569 | 31.1528 | 34.1402 |
| hsa-miR-191-002299 |  |  |  |  |  |  |
| hsa-miR-192#-002272 | 33.0981 | 32.1751 | 40 | 40 | 40 | 40 |
| hsa-miR-192-000491 |  |  |  |  |  |  |
| hsa-miR-193a-3p-002250 |  |  |  |  |  |  |
| hsa-miR-193a-5p-002281 |  |  |  |  |  |  |
| hsa-miR-193b#-002366 | 40 | 40 | 31.876 | 30.924 | 40 | 35.7316 |
| hsa-miR-193b-002367 |  |  |  |  |  |  |
| hsa-miR-194#-002379 | 40 | 35.5149 | 40 | 39.6855 | 40 | 40 |
| hsa-miR-194-000493 |  |  |  |  |  |  |
| hsa-miR-195#-002107 |  |  |  |  | 8.5297 | 40 |
| hsa-miR-195-000494 |  |  |  |  |  |  |
| hsa-miR-196b-002215 |  |  |  |  |  |  |
| hsa-miR-197-000497 |  |  |  |  |  |  |
| hsa-miR-198-002273 |  |  |  |  |  |  |
| hsa-miR-199a-3p-002304 |  |  |  |  |  |  |
| hsa-miR-19a#-002424 | 31.8778 | 32.7335 | 40 | 33.0746 | 40 | 36.6045 |
| hsa-miR-19a-000395 |  |  |  |  |  |  |
| hsa-miR-19b-000396 |  |  |  |  |  |  |
| hsa-miR-19b-1#-002425 | 24.5958 | 26.5535 | 30.512 | 27.2693 | 30.9265 | 30.8676 |
| hsa-miR-200a#-001011 |  |  |  |  | 31.7372 | 31.9246 |
| hsa-miR-200a-000502 |  |  |  |  |  |  |
| hsa-miR-200b#-002274 |  |  |  |  | 36.6664 | 40 |
| hsa-miR-200b-002251 |  |  |  |  |  |  |
| hsa-miR-200c#-002286 |  |  |  |  | 39.0944 | 35.7041 |
| hsa-miR-200c-002300 |  |  |  |  |  |  |
| hsa-miR-202-002363 |  |  |  |  |  |  |
| hsa-miR-203-000507 |  |  |  |  |  |  |
| hsa-miR-204-000508 |  |  |  |  |  |  |
| hsa-miR-206-000510 | 40 | 38.7327 | 40 | 35.976 | 36.9684 | 40 |
| hsa-miR-208-000511 |  |  |  |  |  |  |
| hsa-miR-20a#-002437 | 27.0442 | 28.6408 | 30.9813 | 29.0088 | 32.3496 | 32.5687 |
| hsa-miR-20a-000580 |  |  |  |  |  |  |
| hsa-miR-20b#-002311 |  |  |  |  | 40 | 14.7992 |
| hsa-miR-20b-001014 |  |  |  |  |  |  |
| hsa-miR-21#-002438 | 40 | 33.1056 | 32.0994 | 34.08 | 32.1865 | 32.5273 |
| hsa-miR-21-000397 |  |  |  |  |  |  |
| hsa-miR-210-000512 |  |  |  |  |  |  |
| hsa-miR-211-000514 |  |  |  |  |  |  |
| hsa-miR-212-000515 |  |  |  |  |  |  |
| hsa-miR-213-000516 | 40 | 40 | 34.4887 | 40 | 33.0183 | 40 |
| hsa-miR-214-002306 |  |  |  |  |  |  |
| hsa-miR-215-000518 |  |  |  |  |  |  |
| hsa-miR-218-000521 |  |  |  |  |  |  |
| hsa-miR-219-1-3p-002095 |  |  |  |  |  |  |
| hsa-miR-22#-002301 | 32.7476 | 34.3173 | 40 | 32.8415 | 36.5678 | 40 |
| hsa-miR-22-000398 |  |  |  |  |  |  |
| hsa-miR-221#-002096 |  |  |  |  | 34.3045 | 40 |
| hsa-miR-221-000524 |  |  |  |  |  |  |
| hsa-miR-222#-002097 |  |  |  |  | 29.2661 | 28.9473 |
| hsa-miR-222-002276 |  |  |  |  |  |  |
| hsa-miR-223#-002098 | 29.1167 | 31.1612 | 40 | 30.2616 | 40 | 40 |
| hsa-miR-223-002295 |  |  |  |  |  |  |
| hsa-miR-224-002099 |  |  |  |  |  |  |
| hsa-miR-23a-000399 |  |  |  |  |  |  |
| hsa-miR-23b-000400 |  |  |  |  |  |  |
| hsa-miR-24-000402 |  |  |  |  |  |  |
| hsa-miR-24-2#-002441 | 40 | 34.7623 | 40 | 33.8816 | 32.1263 | 32.2353 |
| hsa-miR-25#-002442 | 30.6254 | 30.783 | 34.1888 | 32.2255 | 40 | 36.7159 |
| hsa-miR-25-000403 |  |  |  |  |  |  |
| hsa-miR-26a-000405 |  |  |  |  |  |  |
| hsa-miR-26a-1#-002443 | 34.4716 | 35.0452 | 40 | 33.9448 | 32.6082 | 34.119 |
| hsa-miR-26b#-002444 | 31.9781 | 34.2351 | 35.9672 | 33.7094 | 33.0766 | 32.9808 |
| hsa-miR-26b-000407 |  |  |  |  |  |  |
| hsa-miR-27a#-002445 | 32.4335 | 34.3874 | 36.2646 | 34.9815 | 31.2338 | 31.5153 |
| hsa-miR-27a-000408 |  |  |  |  |  |  |
| hsa-miR-27b#-002174 |  |  |  |  | 33.8123 | 40 |
| hsa-miR-27b-000409 |  |  |  |  |  |  |
| hsa-miR-28-000411 |  |  |  |  |  |  |
| hsa-miR-28-3p-002446 |  |  |  |  |  |  |
| hsa-miR-296-000527 |  |  |  |  |  |  |
| hsa-miR-296-3p-002101 |  |  |  |  |  |  |
| hsa-miR-299-3p-001015 |  |  |  |  |  |  |
| hsa-miR-299-5p-000600 |  |  |  |  |  |  |
| hsa-miR-29a#-002447 | 40 | 40 | 35.4878 | 37.2342 | 30.7889 | 31.5809 |
| hsa-miR-29a-002112 |  |  |  |  |  |  |
| hsa-miR-29b-000413 |  |  |  |  |  |  |
| hsa-miR-29b-2#-002166 | 32.6195 | 32.7294 | 40 | 32.9613 | 35.8666 | 23.6045 |
| hsa-miR-29c-000587 |  |  |  |  |  |  |
| hsa-miR-301-000528 |  |  |  |  |  |  |
| hsa-miR-301b-002392 |  |  |  |  |  |  |
| hsa-miR-302b#-002119 | 40 | 40 | 40 | 40 | 40 | 40 |
| hsa-miR-302c-000533 |  |  |  |  |  |  |
| hsa-miR-30a-3p-000416 | 32.05 | 40 | 35.0982 | 35.2802 | 37.0033 | 35.6755 |
| hsa-miR-30a-5p-000417 | 28.6895 | 28.8402 | 27.9112 | 27.9624 | 28.2455 | 28.8485 |
| hsa-miR-30b-000602 |  |  |  |  |  |  |
| hsa-miR-30c-000419 |  |  |  |  |  |  |
| hsa-miR-30c-1#-002108 | 40 | 33.8393 | 40 | 40 | 40 | 40 |
| hsa-miR-30d#-002305 | 32.9696 | 33.4962 | 32.7045 | 32.7601 | 35.4466 | 32.9086 |
| hsa-miR-30d-000420 | 30.1035 | 30.6695 | 29.0921 | 28.6301 | 29.9694 | 30.5675 |
| hsa-miR-30e-3p-000422 | 28.0635 | 27.7876 | 30.0682 | 29.1197 | 29.3769 | 30.1282 |
| hsa-miR-31#-002113 |  |  |  |  | 25.4644 | 25.2171 |
| hsa-miR-31-002279 |  |  |  |  |  |  |
| hsa-miR-32-002109 |  |  |  |  |  |  |
| hsa-miR-320-002277 |  |  |  |  |  |  |
| hsa-miR-320B-002844 | 32.7494 | 32.0777 | 31.4749 | 31.0678 | 29.9535 | 31.4053 |
| hsa-miR-323-3p-002227 |  |  |  |  |  |  |
| hsa-miR-324-3p-002161 |  |  |  |  |  |  |
| hsa-miR-324-5p-000539 |  |  |  |  |  |  |
| hsa-miR-328-000543 |  |  |  |  |  |  |
| hsa-miR-330-000544 |  |  |  |  |  |  |
| hsa-miR-331-000545 |  |  |  |  |  |  |
| hsa-miR-331-5p-002233 |  |  |  |  |  |  |
| hsa-miR-335#-002185 | 30.0511 | 33.4702 | 40 | 33.1605 | 32.1272 | 31.7487 |
| hsa-miR-335-000546 |  |  |  |  |  |  |
| hsa-miR-337-5p-002156 |  |  |  |  |  |  |
| hsa-miR-338-3p-002252 |  |  |  |  |  |  |
| hsa-miR-338-5P-002658 | 40 | 34.8437 | 35.7544 | 32.9163 | 34.7298 | 35.4864 |
| hsa-miR-339-3p-002184 |  |  |  |  |  |  |
| hsa-miR-339-5p-002257 |  |  |  |  |  |  |
| hsa-miR-33a#-002136 | 30.7834 | 31.1722 | 32.8088 | 30.9197 | 33.7306 | 36.2061 |
| hsa-miR-33a-002135 | 40 | 35.3965 | 40 | 40 | 40 | 40 |
| hsa-miR-340#-002259 | 32.1059 | 33.6741 | 40 | 33.1106 | 33.4008 | 34.1316 |
| hsa-miR-340-002258 |  |  |  |  |  |  |
| hsa-miR-342-3p-002260 |  |  |  |  |  |  |
| hsa-miR-342-5p-002147 |  |  |  |  |  |  |
| hsa-miR-345-002186 |  |  |  |  |  |  |
| hsa-miR-346-000553 |  |  |  |  |  |  |
| hsa-miR-34a#-002316 |  |  |  |  | 30.9203 | 30.226 |
| hsa-miR-34a-000426 |  |  |  |  |  |  |
| hsa-miR-34b-002102 | 32.8981 | 39.8463 | 34.0795 | 33.6646 | 34.2442 | 34.2375 |
| hsa-miR-34c-000428 |  |  |  |  |  |  |
| hsa-miR-361-000554 |  |  |  |  |  |  |
| hsa-miR-361-3p-002116 |  |  |  |  | 32.0502 | 34.8757 |
| hsa-miR-362-001273 |  |  |  |  |  |  |
| hsa-miR-362-3p-002117 |  |  |  |  |  |  |
| hsa-miR-363-001271 |  |  |  |  |  |  |
| hsa-miR-365-001020 |  |  |  |  |  |  |
| hsa-miR-367-000555 |  |  |  |  |  |  |
| hsa-miR-369-3p-000557 |  |  |  |  |  |  |
| hsa-miR-369-5p-001021 |  |  |  |  |  |  |
| hsa-miR-370-002275 |  |  |  |  |  |  |
| hsa-miR-371-3p-002124 |  |  |  |  |  |  |
| hsa-miR-372-000560 |  |  |  |  |  |  |
| hsa-miR-373-000561 |  |  |  |  |  |  |
| hsa-miR-374-000563 |  |  |  |  |  |  |
| hsa-miR-374a#-002125 | 40 | 40 | 40 | 34.977 | 40 | 40 |
| hsa-miR-375-000564 |  |  |  |  |  |  |
| hsa-miR-376a-000565 |  |  |  |  |  |  |
| hsa-miR-376c-002122 |  |  |  |  |  |  |
| hsa-miR-378-000567 | 31.9325 | 32.6332 | 32.1016 | 32.4498 | 34.4735 | 39.0843 |
| hsa-miR-378-002243 | 23.5397 | 24.8467 | 24.2602 | 24.2209 | 26.3208 | 26.6491 |
| hsa-miR-381-000571 |  |  |  |  |  |  |
| hsa-miR-382-000572 |  |  |  |  |  |  |
| hsa-miR-383-000573 |  |  |  |  |  |  |
| hsa-miR-409-3p-002332 |  |  |  |  | 32.851 | 34.1639 |
| hsa-miR-410-001274 |  |  |  |  |  |  |
| hsa-miR-411-001610 |  |  |  |  |  |  |
| hsa-miR-422a-002297 |  |  |  |  |  |  |
| hsa-miR-423-5p-002340 |  |  |  |  |  |  |
| hsa-miR-424#-002309 | 32.5008 | 40 | 40 | 34.9793 | 40 | 40 |
| hsa-miR-424-000604 |  |  |  |  |  |  |
| hsa-miR-425#-002302 | 30.9415 | 31.3921 | 40 | 31.8223 | 32.4238 | 32.475 |
| hsa-miR-425-5p-001516 |  |  |  |  |  |  |
| hsa-miR-429-001024 |  |  |  |  |  |  |
| hsa-miR-432#-001027 | 30.741 | 31.5718 | 33.961 | 32.7025 | 35.3351 | 40 |
| hsa-miR-432-001026 |  |  |  |  | 40 | 37.5998 |
| hsa-miR-433-001028 |  |  |  |  |  |  |
| hsa-miR-448-001029 |  |  |  |  |  |  |
| hsa-miR-449-001030 |  |  |  |  |  |  |
| hsa-miR-449b-001608 |  |  |  |  |  |  |
| hsa-miR-450a-002303 |  |  |  |  |  |  |
| hsa-miR-450b-5p-002207 |  |  |  |  |  |  |
| hsa-miR-452-002329 |  |  |  |  |  |  |
| hsa-miR-454#-001996 | 32.3818 | 33.4875 | 34.5093 | 34.0777 | 35.8063 | 34.69 |
| hsa-miR-454-002323 |  |  |  |  |  |  |
| hsa-miR-455-001280 |  |  |  |  |  |  |
| hsa-miR-455-3p-002244 |  |  |  |  |  |  |
| hsa-miR-483-3p-002339 |  |  |  |  | 33.882 | 31.4383 |
| hsa-miR-483-5p-002338 |  |  |  |  |  |  |
| hsa-miR-484-001821 |  |  |  |  |  |  |
| hsa-miR-485-3p-001277 |  |  |  |  |  |  |
| hsa-miR-486-001278 |  |  |  |  |  |  |
| hsa-miR-486-3p-002093 |  |  |  |  |  |  |
| hsa-miR-487a-001279 |  |  |  |  |  |  |
| hsa-miR-487b-001285 |  |  |  |  |  |  |
| hsa-miR-488-001106 | 40 | 36.9613 | 40 | 40 | 40 | 40 |
| hsa-miR-489-002358 |  |  |  |  |  |  |
| hsa-miR-490-001037 |  |  |  |  |  |  |
| hsa-miR-494-002365 |  |  |  |  |  |  |
| hsa-miR-497-001043 | 40 | 40 | 40 | 36.8459 | 36.274 | 40 |
| hsa-miR-500-001046 | 40 | 40 | 40 | 34.3429 | 17.8485 | 40 |
| hsa-miR-500-002428 |  |  |  |  |  |  |
| hsa-miR-501-001047 |  |  |  |  |  |  |
| hsa-miR-501-3p-002435 |  |  |  |  |  |  |
| hsa-miR-502-001109 |  |  |  |  |  |  |
| hsa-miR-502-3p-002083 |  |  |  |  |  |  |
| hsa-miR-503-001048 |  |  |  |  |  |  |
| hsa-miR-505#-002087 | 33.8606 | 34.6489 | 32.1814 | 32.2915 | 33.1935 | 35.81 |
| hsa-miR-505-002089 |  |  |  |  |  |  |
| hsa-miR-508-001052 |  |  |  |  |  |  |
| hsa-miR-509-5p-002235 |  |  |  |  |  |  |
| hsa-miR-511-001111 |  |  |  |  |  |  |
| hsa-miR-512-3p-001823 |  |  |  |  |  |  |
| hsa-miR-515-5p-001112 |  |  |  |  |  |  |
| hsa-miR-516-3p-001149 | 37.0084 | 37.5226 | 38.7649 | 35.433 | 34.6522 | 33.2391 |
| hsa-miR-517a-002402 |  |  |  |  |  |  |
| hsa-miR-517c-001153 |  |  |  |  |  |  |
| hsa-miR-518a-3p-002397 |  |  |  |  |  |  |
| hsa-miR-518b-001156 |  |  |  |  |  |  |
| hsa-miR-518d-001159 |  |  |  |  |  |  |
| hsa-miR-518e-002395 |  |  |  |  |  |  |
| hsa-miR-518f-002388 |  |  |  |  |  |  |
| hsa-miR-519a-002415 |  |  |  |  |  |  |
| hsa-miR-519d-002403 |  |  |  |  |  |  |
| hsa-miR-519e-002370 |  |  |  |  |  |  |
| hsa-miR-520c-3p-002400 | 39.9335 | 38.1201 | 34.3594 | 37.1498 | 37.1377 | 37.9573 |
| hsa-miR-520D-3P-002743 | 38.2727 | 40 | 36.3769 | 36.6153 | 33.5636 | 39.0047 |
| hsa-miR-523-002386 |  |  |  |  |  |  |
| hsa-miR-532-001518 |  |  |  |  |  |  |
| hsa-miR-532-3p-002355 |  |  |  |  |  |  |
| hsa-miR-539-001286 |  |  |  |  |  |  |
| hsa-miR-542-3p-001284 |  |  |  |  |  |  |
| hsa-miR-542-5p-002240 |  |  |  |  |  |  |
| hsa-miR-545#-002266 | 40 | 36.703 | 37.7809 | 36.8436 | 36.018 | 40 |
| hsa-miR-545-002267 |  |  |  |  |  |  |
| hsa-miR-548b-001541 |  |  |  |  |  |  |
| hsa-miR-548b-5p-002408 |  |  |  |  |  |  |
| hsa-miR-548c-5p-002429 |  |  |  |  |  |  |
| hsa-miR-548d-001605 |  |  |  |  |  |  |
| hsa-miR-548d-5p-002237 |  |  |  |  |  |  |
| hsa-miR-548E-002881 | 30.3046 | 40 | 40 | 40 | 40 | 40 |
| hsa-miR-548H-002816 | 40 | 33.5761 | 40 | 36.6393 | 40 | 40 |
| hsa-miR-548I-002909 | 35.8173 | 34.7012 | 40 | 40 | 40 | 40 |
| hsa-miR-548J-002783 | 37.6279 | 40 | 40 | 39.2455 | 40 | 40 |
| hsa-miR-548K-002819 | 40 | 36.4681 | 40 | 40 | 40 | 40 |
| hsa-miR-548N-002888 |  |  |  |  | 40 | 34.4376 |
| hsa-miR-548P-002798 |  |  |  |  | 40 | 36.9658 |
| hsa-miR-549-001511 | 38.7266 | 37.4071 | 36.6253 | 37.3482 | 40 | 37.487 |
| hsa-miR-550-001544 |  |  |  |  | 37.0712 | 22.6042 |
| hsa-miR-550-002410 | 31.1413 | 30.8289 | 40 | 32.0142 | 33.4569 | 33.9445 |
| hsa-miR-551b#-002346 | 36.6534 | 33.8133 | 36.7587 | 35.8736 | 37.4152 | 35.6434 |
| hsa-miR-558-001526 |  |  |  |  | 35.1868 | 40 |
| hsa-miR-561-001528 |  |  |  |  |  |  |
| hsa-miR-563-001530 |  |  |  |  | 35.3953 | 31.5489 |
| hsa-miR-564-001531 |  |  |  |  | 35.2973 | 40 |
| hsa-miR-569-001536 |  |  |  |  | 40 | 40 |
| hsa-miR-570-002347 |  |  |  |  |  |  |
| hsa-miR-571-001613 |  |  |  |  | 33.8739 | 40 |
| hsa-miR-572-001614 | 38.7718 | 40 | 36.2753 | 34.0028 | 40 | 34.9027 |
| hsa-miR-573-001615 | 33.7188 | 34.9322 | 39.0447 | 34.0045 | 38.3058 | 37.1675 |
| hsa-miR-574-3p-002349 |  |  |  |  |  |  |
| hsa-miR-575-001617 | 40 | 40 | 36.9736 | 40 | 40 | 40 |
| hsa-miR-576-3p-002351 |  |  |  |  |  |  |
| hsa-miR-576-5p-002350 |  |  |  |  |  |  |
| hsa-miR-577-002675 | 30.7304 | 31.4975 | 31.3453 | 31.1784 | 29.9428 | 29.5442 |
| hsa-miR-579-002398 |  |  |  |  |  |  |
| hsa-miR-580-001621 | 40 | 40 | 40 | 33.9259 | 40 | 40 |
| hsa-miR-582-3p-002399 |  |  |  |  |  |  |
| hsa-miR-582-5p-001983 |  |  |  |  |  |  |
| hsa-miR-584-001624 |  |  |  |  | 31.5676 | 40 |
| hsa-miR-586-001539 |  |  |  |  | 16.0293 | 37.598 |
| hsa-miR-588-001542 |  |  |  |  | 21.4258 | 24.9634 |
| hsa-miR-589-001543 |  |  |  |  | 30.0908 | 40 |
| hsa-miR-590-3P-002677 | 28.9199 | 30.6324 | 31.3392 | 29.7591 | 30.3943 | 30.3461 |
| hsa-miR-590-5p-001984 |  |  |  |  |  |  |
| hsa-miR-595-001987 |  |  |  |  | 40 | 15.5536 |
| hsa-miR-597-001551 |  |  |  |  |  |  |
| hsa-miR-598-001988 |  |  |  |  |  |  |
| hsa-miR-599-001554 |  |  |  |  | 28.8202 | 40 |
| hsa-miR-601-001558 | 40 | 37.3615 | 40 | 40 | 40 | 40 |
| hsa-miR-604-001567 |  |  |  |  | 29.7106 | 40 |
| hsa-miR-605-001568 |  |  |  |  | 36.2199 | 40 |
| hsa-miR-606-001569 |  |  |  |  | 34.4592 | 40 |
| hsa-miR-608-001571 |  |  |  | 39.1297 | 31.1043 | 27.5022 |
| hsa-miR-609-001573 | 19.9159 | 22.4539 | 23.44 | 21.0806 | 23.6946 | 27.1742 |
| hsa-miR-613-001586 |  |  |  |  | 35.6795 | 29.2055 |
| hsa-miR-615-5p-002353 |  |  |  |  |  |  |
| hsa-miR-616-002414 |  |  |  |  |  |  |
| hsa-miR-617-001591 | 30.2746 | 30.7078 | 31.6232 | 29.6469 | 32.6744 | 31.3136 |
| hsa-miR-618-001593 |  |  |  |  |  |  |
| hsa-miR-622-001553 |  |  |  |  | 4.5487 | 40 |
| hsa-miR-625#-002432 | 25.4553 | 26.7155 | 28.379 | 27.2978 | 28.5757 | 28.2158 |
| hsa-miR-625-002431 |  |  |  |  |  |  |
| hsa-miR-627-001560 |  |  |  |  |  |  |
| hsa-miR-628-3p-002434 | 35.9021 | 40 | 36.4827 | 33.6129 | 33.7215 | 38.0092 |
| hsa-miR-628-5p-002433 |  |  |  |  |  |  |
| hsa-miR-629-001562 |  |  |  |  | 33.3199 | 34.9583 |
| hsa-miR-629-002436 |  |  |  |  |  |  |
| hsa-miR-635-001578 |  |  |  |  | 40 | 40 |
| hsa-miR-636-002088 |  |  |  |  |  |  |
| hsa-miR-642-001592 |  |  |  |  |  |  |
| hsa-miR-649-001602 |  |  |  |  | 35.6827 | 40 |
| hsa-miR-650-001603 |  |  |  |  | 33.6137 | 34.7786 |
| hsa-miR-651-001604 |  |  |  |  |  |  |
| hsa-miR-652-002352 |  |  |  |  |  |  |
| hsa-miR-655-001612 |  |  |  |  |  |  |
| hsa-miR-656-001510 |  |  |  |  | 37.1336 | 37.3722 |
| hsa-miR-657-001512 |  |  |  |  | 40 | 37.0485 |
| hsa-miR-660-001515 |  |  |  |  |  |  |
| hsa-miR-661-001606 |  |  |  |  | 32.3905 | 34.146 |
| hsa-miR-662-001607 |  |  |  |  | 38.8019 | 39.9023 |
| hsa-miR-663B-002857 | 32.0741 | 30.4124 | 31.8701 | 32.6681 | 32.4333 | 40 |
| hsa-miR-664-002897 | 30.5398 | 30.5987 | 30.85 | 29.851 | 30.4794 | 31.1019 |
| hsa-miR-665-002681 | 37.0627 | 40 | 40 | 40 | 40 | 40 |
| hsa-miR-671-3p-002322 |  |  |  |  |  |  |
| hsa-miR-675-002005 | 32.0269 | 33.7452 | 40 | 32.9195 | 40 | 40 |
| hsa-miR-720-002895 | 22.3903 | 22.7349 | 24.1947 | 23.0393 | 24.0234 | 23.8285 |
| hsa-miR-744#-002325 | 40 | 32.8368 | 34.167 | 34.3072 | 33.2216 | 37.0954 |
| hsa-miR-744-002324 |  |  |  |  |  |  |
| hsa-miR-766-001986 | 30.7039 | 29.2726 | 29.2137 | 28.4293 | 31.4564 | 30.9785 |
| hsa-miR-767-5p-001993 | 32.2529 | 34.5579 | 40 | 34.3274 | 40 | 40 |
| hsa-miR-769-5p-001998 | 30.165 | 30.9865 | 29.9434 | 29.9705 | 30.9191 | 31.0452 |
| hsa-miR-802-002004 | 36.1016 | 40 | 40 | 40 | 40 | 40 |
| hsa-miR-875-5p-002203 | 36.9214 | 36.4134 | 35.0204 | 33.9652 | 34.4441 | 36.5306 |
| hsa-miR-885-5p-002296 |  |  |  |  |  |  |
| hsa-miR-886-3p-002194 |  |  |  |  |  |  |
| hsa-miR-886-5p-002193 |  |  |  |  |  |  |
| hsa-miR-888-002212 |  |  |  |  |  |  |
| hsa-miR-891a-002191 |  |  |  |  |  |  |
| hsa-miR-892b-002214 | 36.6463 | 40 | 40 | 35.0082 | 39.7561 | 37.6602 |
| hsa-miR-9#-002231 | 30.7451 | 33.1046 | 29.1878 | 29.4923 | 28.7619 | 28.853 |
| hsa-miR-9-000583 |  |  |  |  |  |  |
| hsa-miR-920-002150 |  |  |  |  | 31.0655 | 31.359 |
| hsa-miR-921-002151 |  |  |  |  | 40 | 40 |
| hsa-miR-922-002152 | 31.0281 | 35.2223 | 35.5321 | 40 | 33.5548 | 33.3641 |
| hsa-miR-924-002154 | 31.3997 | 32.8061 | 32.8281 | 32.9031 | 33.1262 | 34.0089 |
| hsa-miR-92a-000431 |  |  |  |  |  |  |
| hsa-miR-92a-1#-002137 | 28.4441 | 29.1461 | 31.7527 | 29.4854 | 33.0548 | 40 |
| hsa-miR-92b#-002343 |  |  |  |  | 36.6654 | 34.9888 |
| hsa-miR-93#-002139 | 24.5802 | 26.2227 | 28.1774 | 26.155 | 26.8835 | 27.0606 |
| hsa-miR-934-002177 | 31.8583 | 40 | 40 | 40 | 40 | 40 |
| hsa-miR-935-002178 | 33.5585 | 34.8078 | 40 | 40 | 30.0518 | 28.8215 |
| hsa-miR-938-002181 |  |  |  |  | 36.9659 | 40 |
| hsa-miR-939-002182 | 25.4358 | 27.5962 | 27.9012 | 26.6989 | 25.7686 | 27.6623 |
| hsa-miR-941-002183 | 31.4634 | 33.1225 | 40 | 34.1834 | 33.5289 | 38.7972 |
| hsa-miR-942-002187 | 29.8643 | 31.1597 | 31.6494 | 31.1036 | 32.5018 | 32.4858 |
| hsa-miR-943-002188 | 40 | 35.1126 | 40 | 40 | 40 | 40 |
| hsa-miR-944-002189 | 40 | 40 | 32.5321 | 32.6659 | 40 | 40 |
| hsa-miR-95-000433 |  |  |  |  |  |  |
| hsa-miR-98-000577 |  |  |  |  |  |  |
| hsa-miR-99a#-002141 | 30.2316 | 30.5531 | 40 | 31.7428 | 40 | 40 |
| hsa-miR-99a-000435 |  |  |  |  |  |  |
| hsa-miR-99b#-002196 | 32.595 | 40 | 40 | 35.8814 | 40 | 40 |
| hsa-miR-99b-000436 |  |  |  |  |  |  |
| mmu-let-7d#-001178 |  |  |  |  | 40 | 34.7822 |
| mmu-miR-124a-001182 |  |  |  |  |  |  |
| mmu-miR-129-3p-001184 |  |  |  |  |  |  |
| mmu-miR-134-001186 |  |  |  |  |  |  |
| mmu-miR-137-001129 |  |  |  |  |  |  |
| mmu-miR-140-001187 |  |  |  |  |  |  |
| mmu-miR-374-5p-001319 |  |  |  |  |  |  |
| mmu-miR-451-001141 |  |  |  |  |  |  |
| mmu-miR-491-001630 |  |  |  |  |  |  |
| mmu-miR-495-001663 |  |  |  |  |  |  |
| mmu-miR-615-001960 |  |  |  |  |  |  |
| mmu-miR-93-001090 |  |  |  |  |  |  |
| mmu-miR-96-000186 |  |  |  |  |  |  |
| rno-miR-29c#-001818 | 34.9894 | 33.8513 | 33.5685 | 36.9161 | 40 | 36.1275 |
| rno-miR-7#-001338 | 27.4577 | 29.4671 | 29.5731 | 30.0658 | 28.9344 | 28.1948 |
| RNU48-001006 | 18.7829 | 20.1239 | 21.9847 | 20.5667 | 22.8898 | 22.9416 |
| U6 snRNA-001973 | 16.4484 | 18.4225 | 19.082 | 18.9947 | 20.5904 | 19.8279 |
| RNU44-001094 |  |  |  |  | 30.3896 | 31.6499 |
